# Supplementary material for: Modeling of dose and sensitivity heterogeneities in radiation therapy
Source: publisher site journal article supplement (doi:10.3762/bjoc.15.113), 2012-01-01

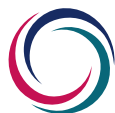

## Supporting Information

for

### **Synthesis of aryl cyclopropyl sulfides through copper-promoted S-cyclopropylation of thiophenols using cyclopropylboronic acid**

Emeline Benoit, Ahmed Fnaiche and Alexandre Gagnon

*Beilstein J. Org. Chem.* **2019**, *15*, 1162–1171. [doi:10.3762/bjoc.15.113](https://doi.org/10.3762/bjoc.15.113)

### **Copies of NMR spectra of synthesized compounds**

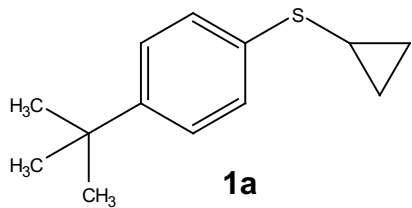

7.330  
7.260

2.234  
2.219  
2.209  
2.205  
2.194  
2.185  
2.180  
2.170  
2.155  
1.325  
1.083  
1.067  
1.061  
1.058  
1.043  
1.036  
1.021  
0.728  
0.712  
0.706  
0.698  
0.691  
0.675

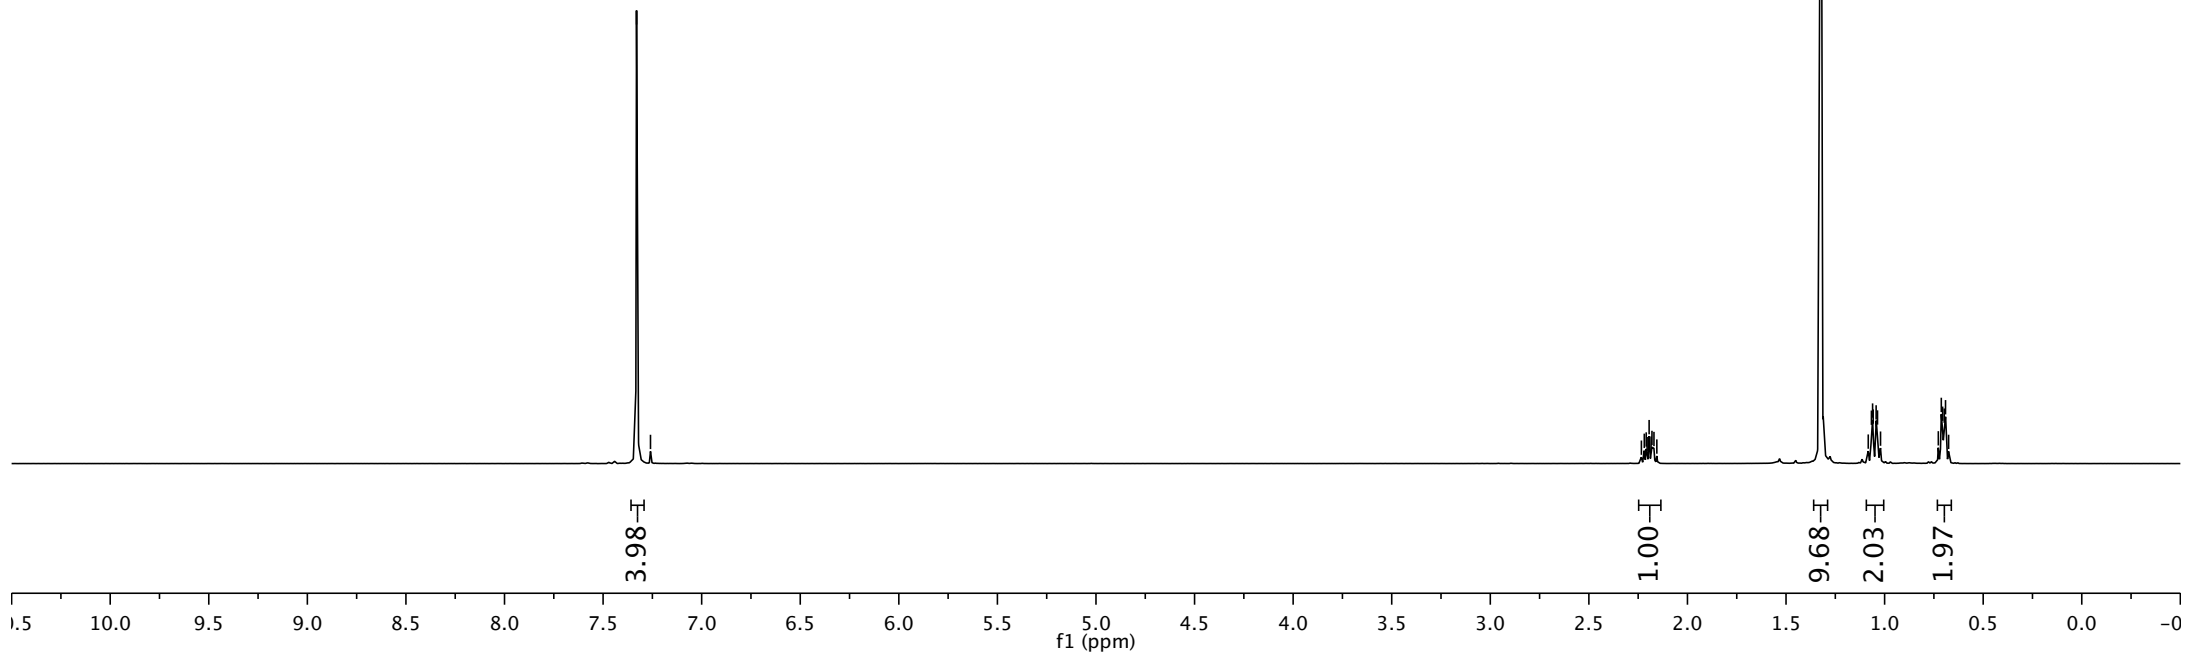

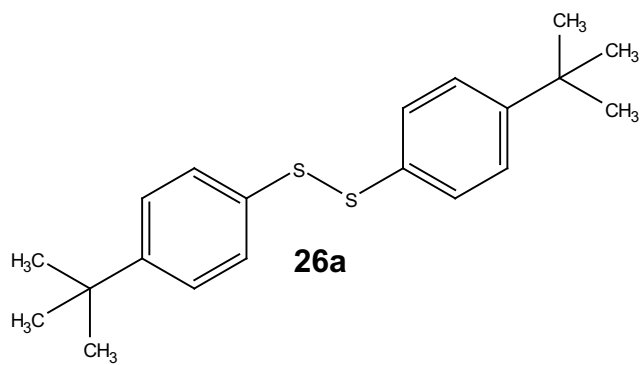

7.463  
7.455  
7.448  
7.433  
7.426  
7.418  
7.348  
7.340  
7.333  
7.319  
7.312  
7.303  
7.260

1.297

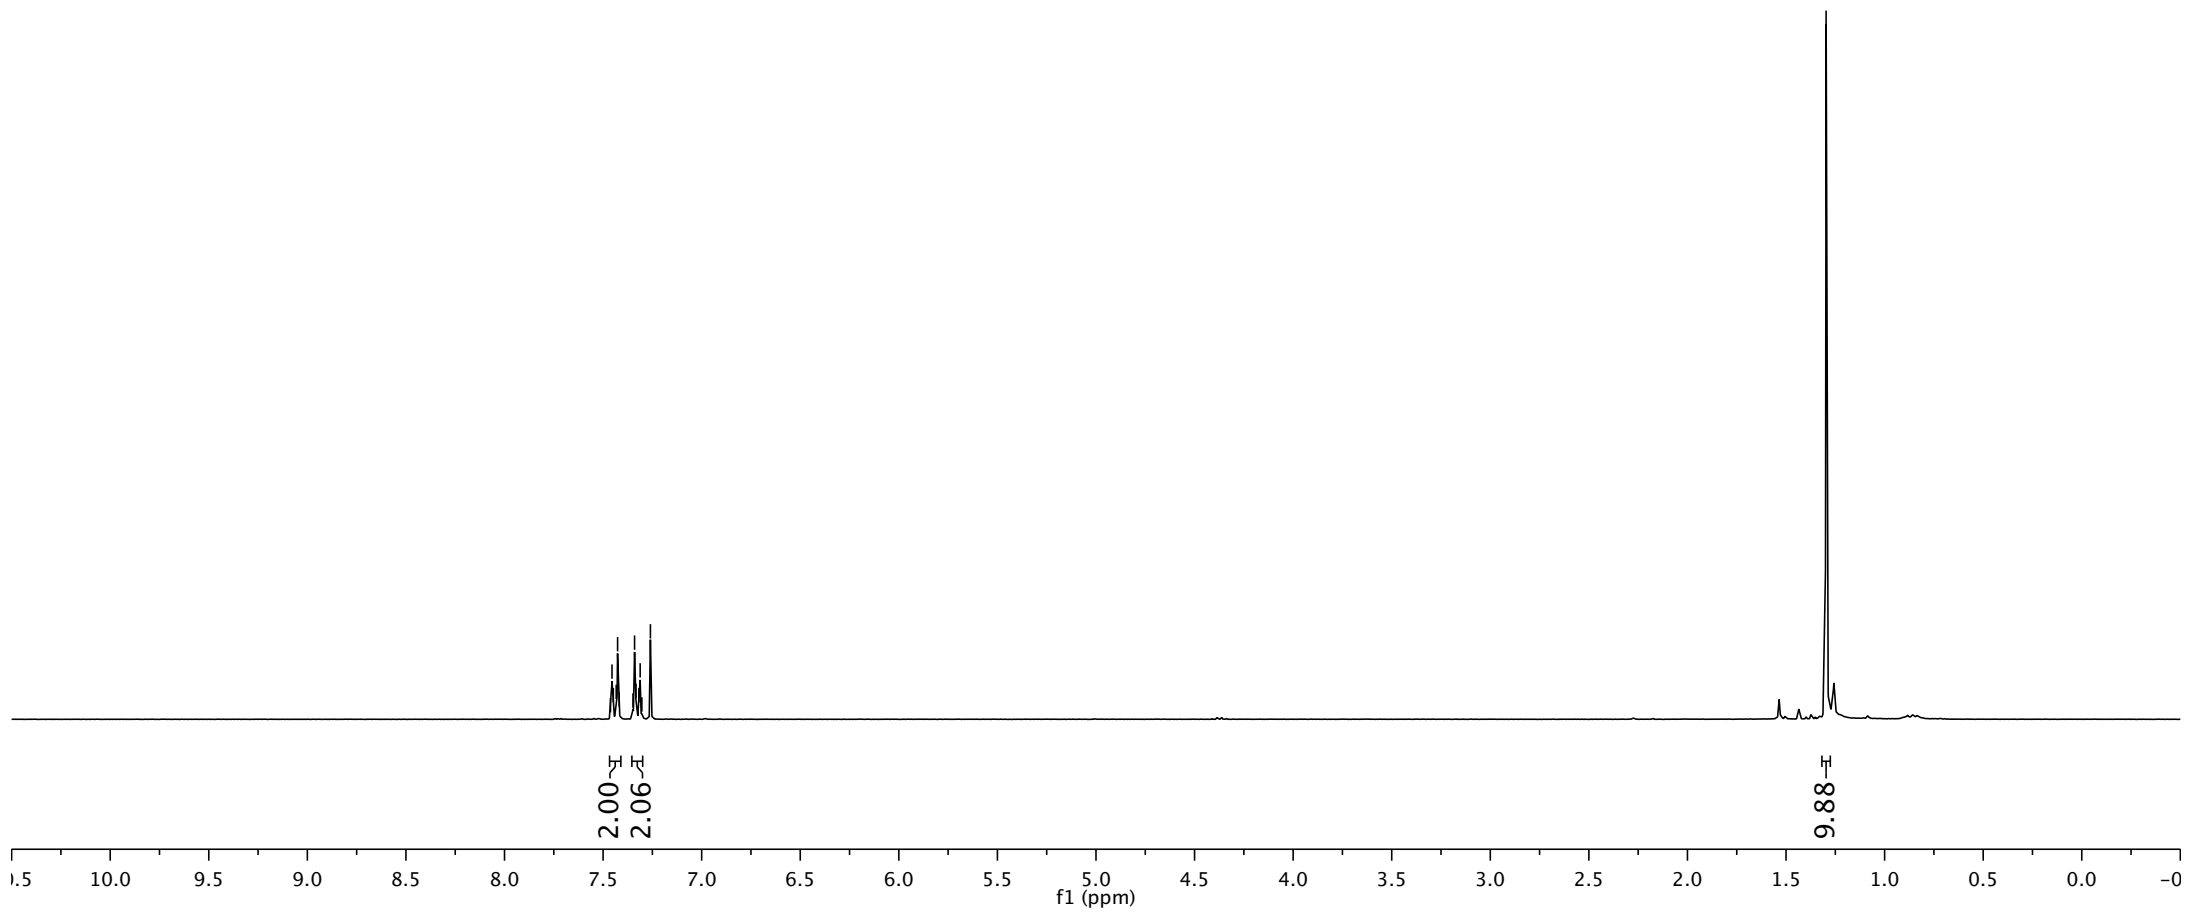

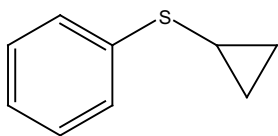

**1b**

7.391  
7.386  
7.379  
7.368  
7.365  
7.362  
7.358  
7.351  
7.315  
7.309  
7.303  
7.291  
7.285  
7.280  
7.261  
7.260  
7.251  
7.165  
7.161  
7.156  
7.143  
7.137  
7.130  
7.117  
7.112  
7.108

2.233  
2.218  
2.208  
2.203  
2.193  
2.184  
2.179  
2.169  
2.154  
1.535

1.079  
1.061  
0.954  
0.712  
0.709  
0.703  
0.697  
0.694  
0.688  
0.672

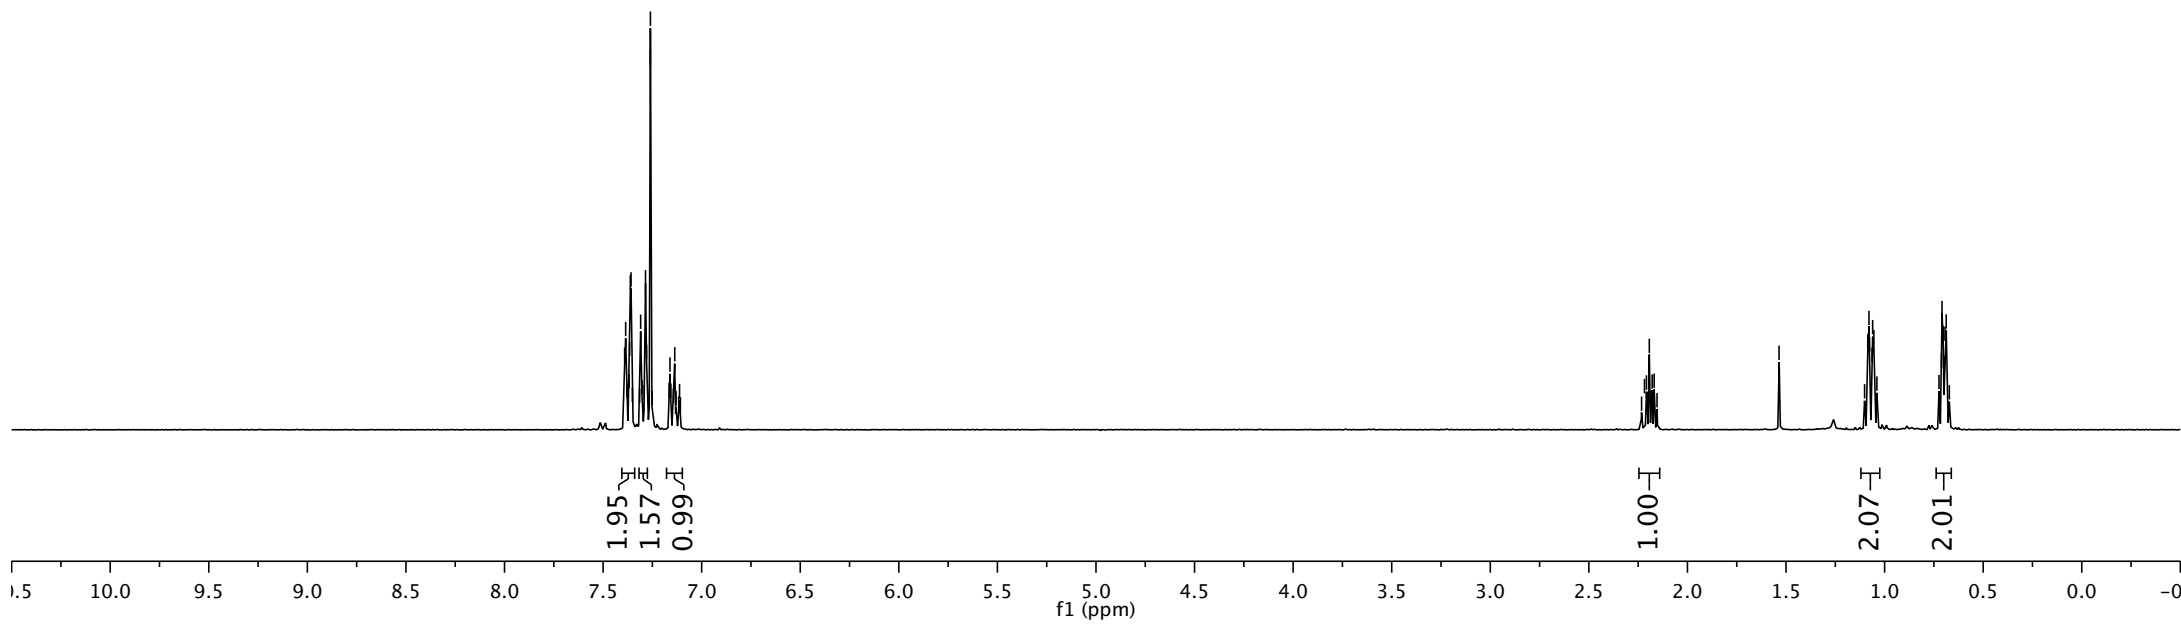

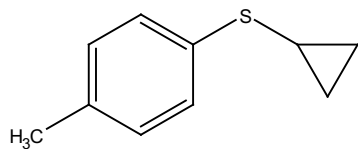

**1c**

7.300  
7.287  
7.260  
7.126  
7.112

2.334  
2.216  
2.209  
2.204  
2.201  
2.196  
2.191  
2.189  
2.184  
2.177  
1.050  
1.046  
1.038  
1.034  
0.917  
0.702  
0.699  
0.694  
0.691  
0.683

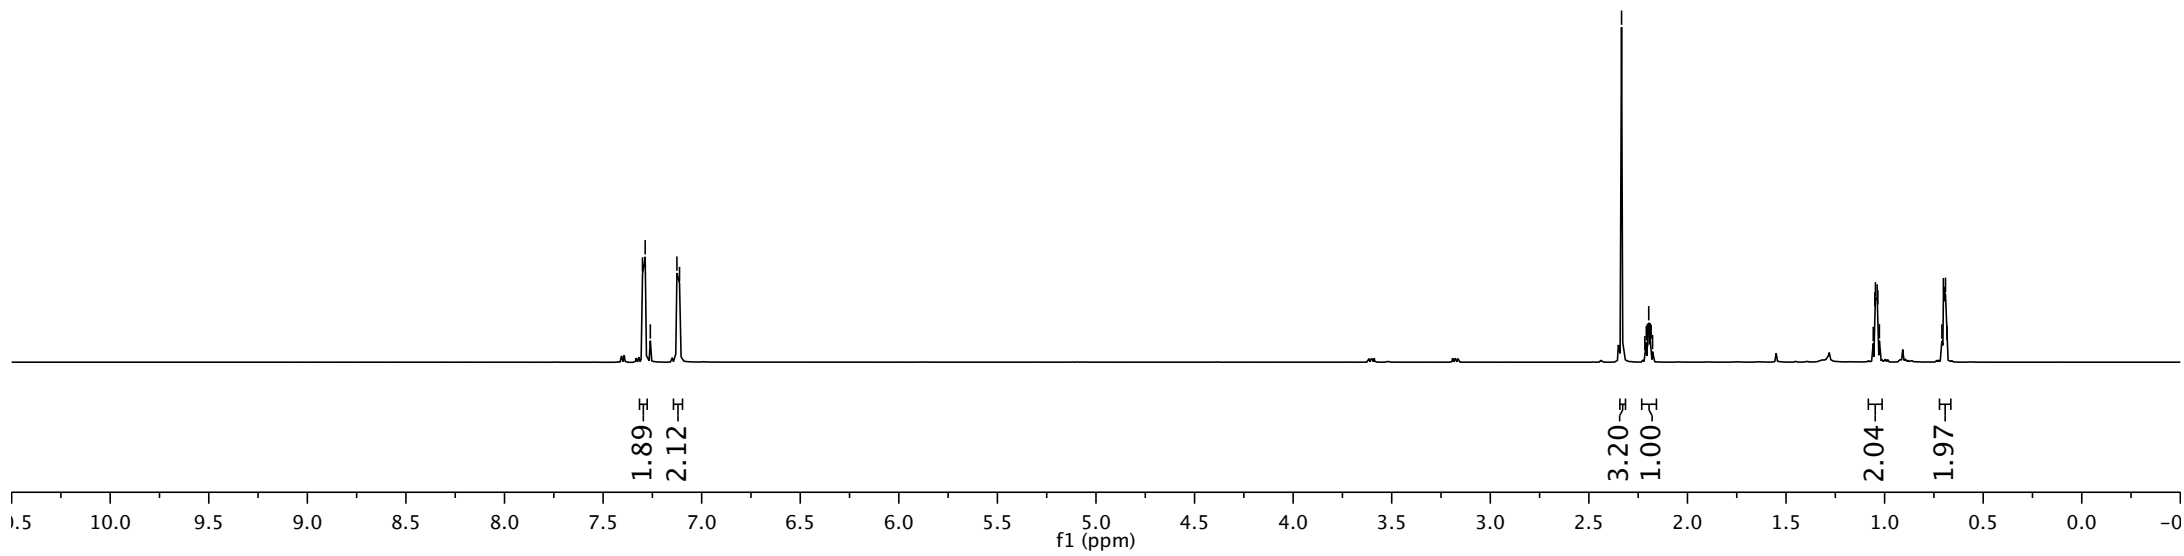

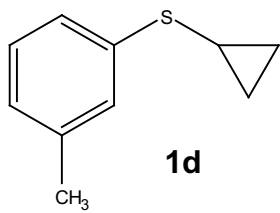

7.260  
7.190  
7.179  
7.176  
6.970  
6.960  
6.954  
6.948  
6.937

2.337  
2.227  
2.212  
2.202  
2.197  
2.188  
2.178  
2.173  
2.163  
2.149  
1.548  
1.078  
1.072  
1.054  
0.948  
0.703  
0.696  
0.688  
0.681  
0.665

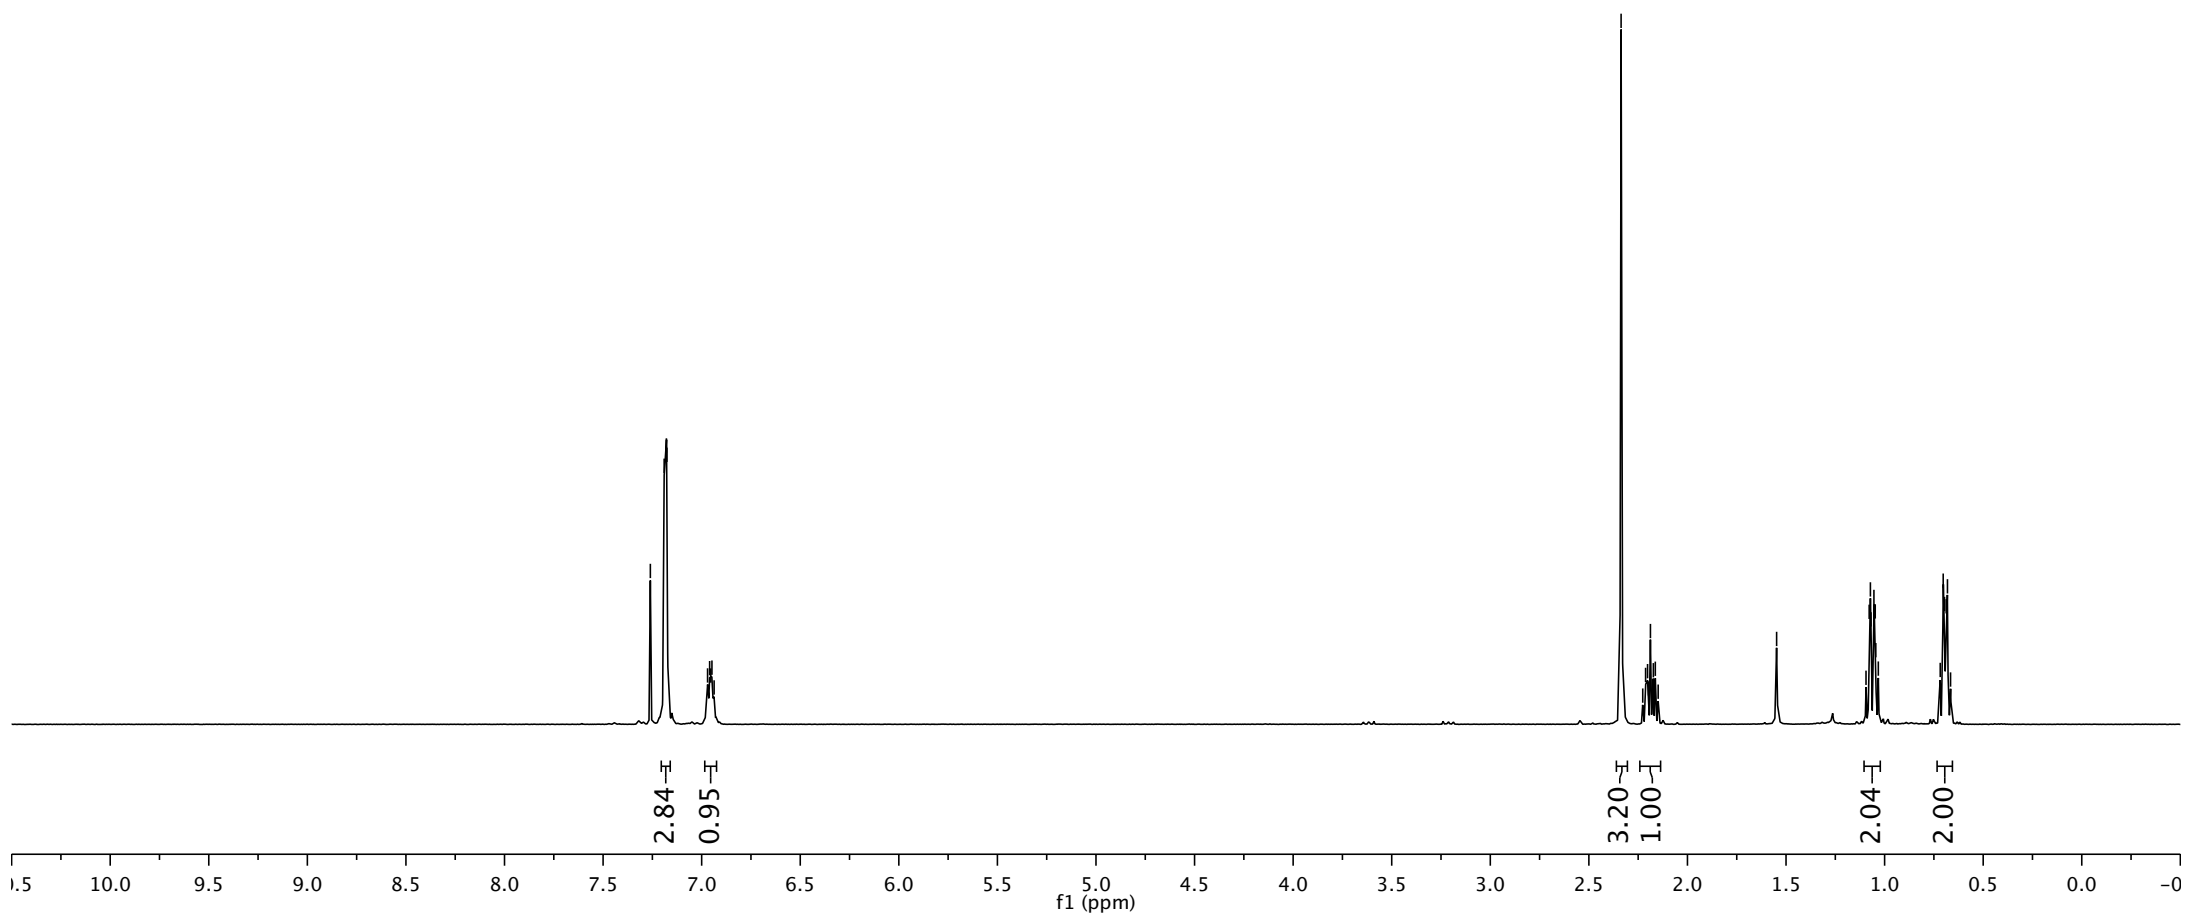

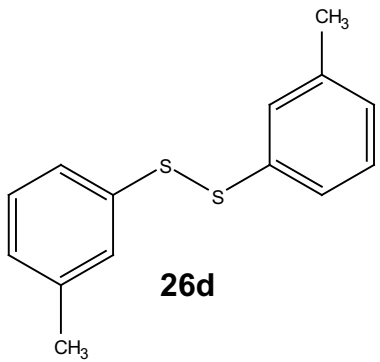

7.315  
7.308  
7.295  
7.260  
7.216  
7.191  
7.163  
7.046  
7.021

2.324

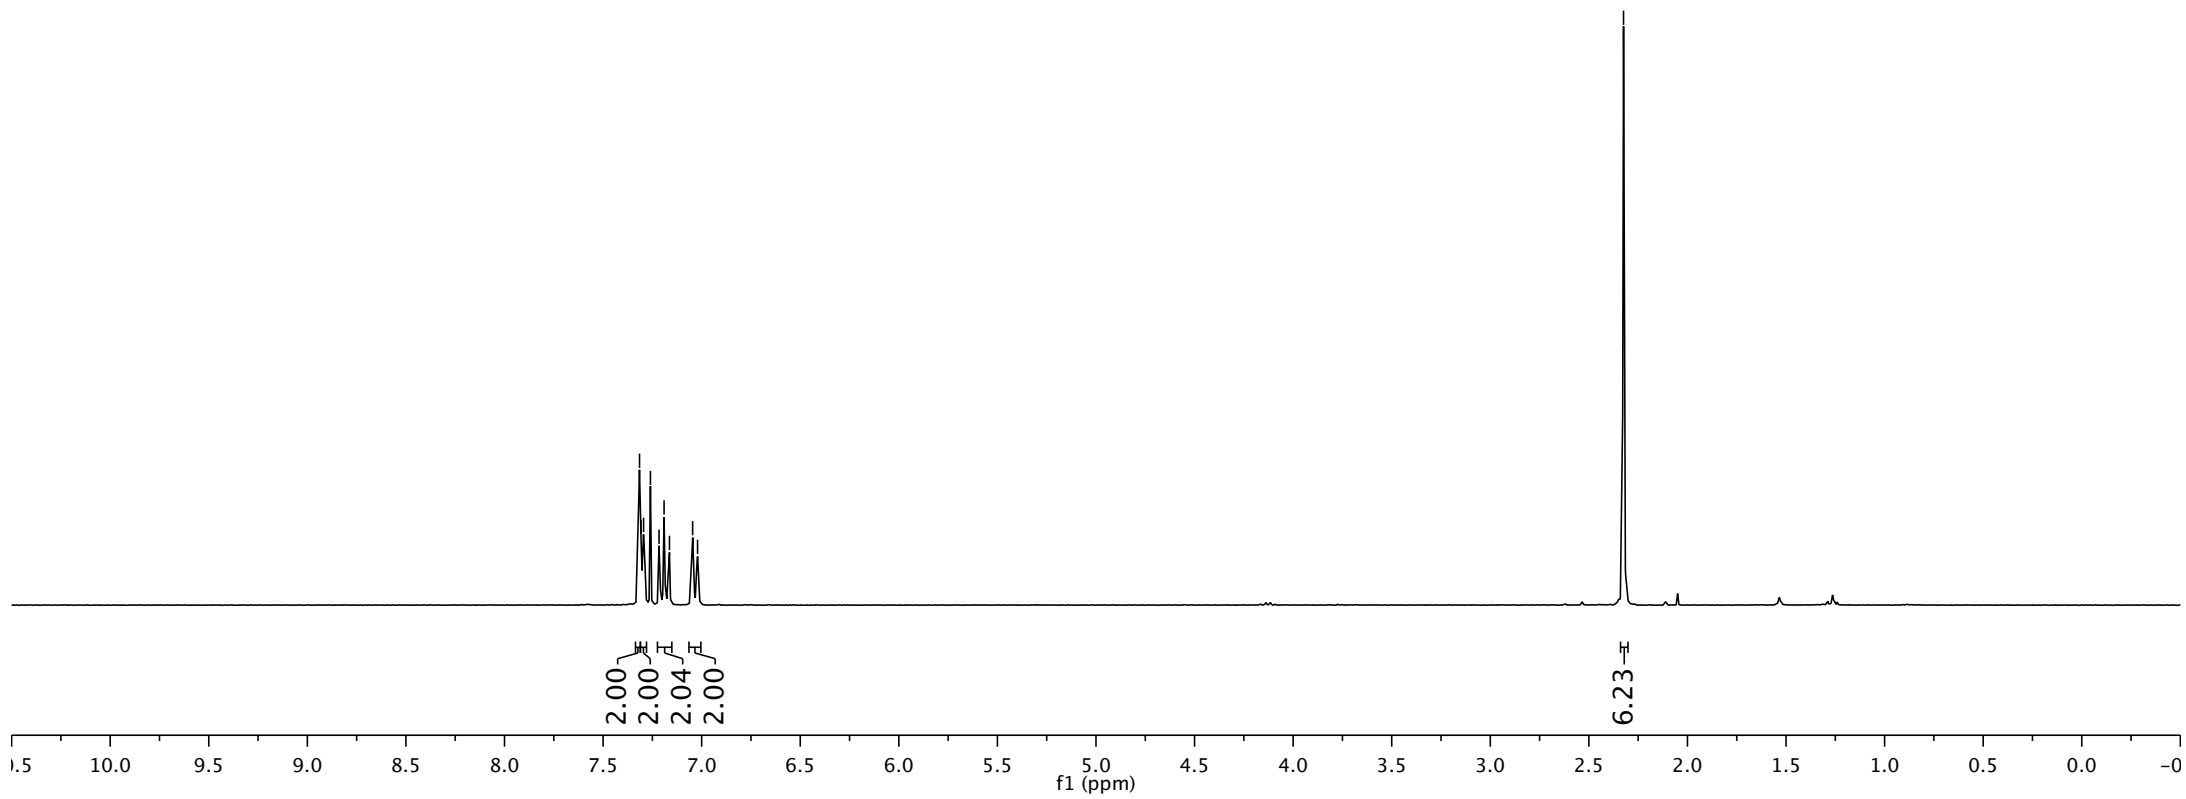

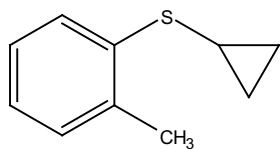

**1e**

7.545  
7.520  
7.224  
7.218  
7.199  
7.194  
7.174  
7.168  
7.153  
7.141  
7.135  
7.116  
7.111  
7.094  
7.086  
7.082  
7.063  
7.058  
7.038  
7.034

2.433  
2.271  
2.172  
2.157  
2.147  
2.142  
2.133  
2.123  
2.118  
2.108  
2.093  
1.545

1.115  
1.108  
0.997  
0.711  
0.704  
0.697  
0.690  
0.674

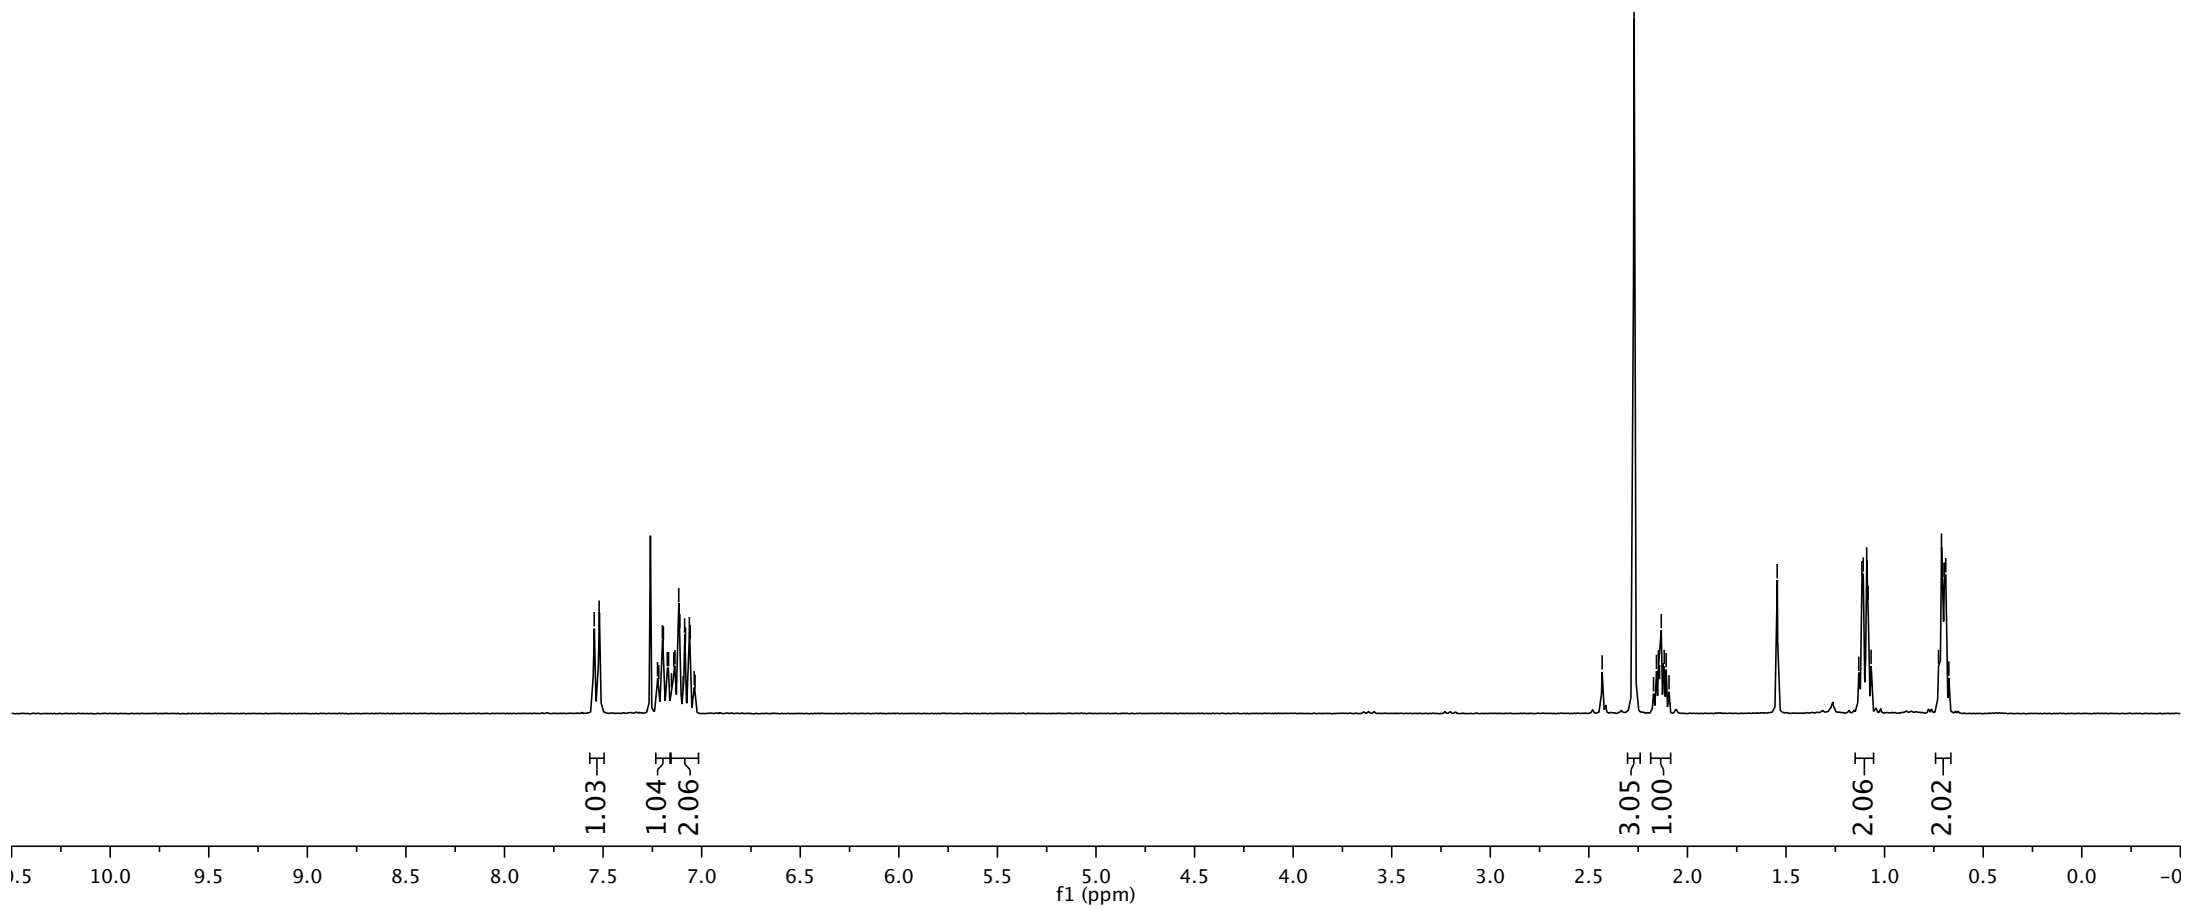



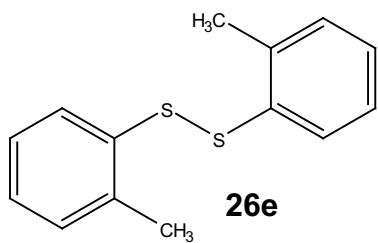

7.529  
7.523  
7.512  
7.500  
7.489  
7.260  
7.173  
7.164  
7.155  
7.150  
7.142  
7.129  
7.119  
7.107  
7.096

—2.429

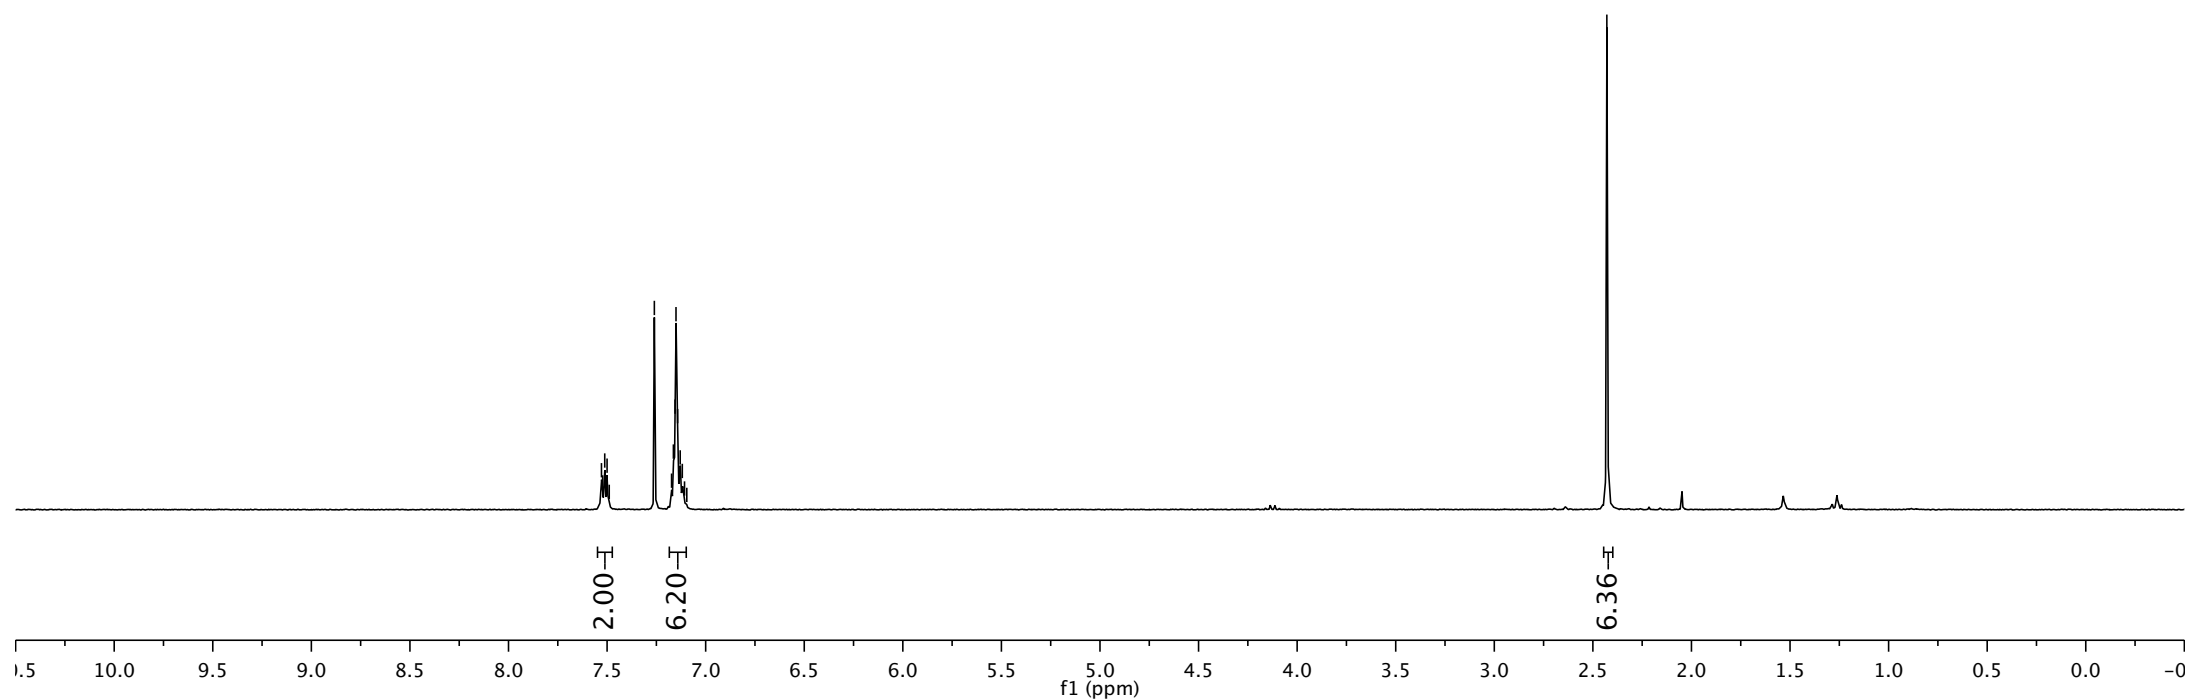

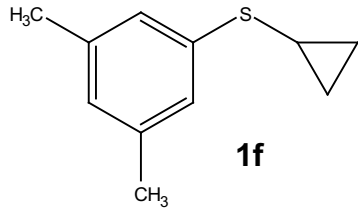

7.260  
6.992  
6.776

2.295  
2.216  
2.201  
2.191  
2.187  
2.177  
2.167  
2.162  
2.152  
2.138  
1.068  
1.061  
1.044  
1.037  
0.922  
0.692  
0.685  
0.677  
0.670  
0.655

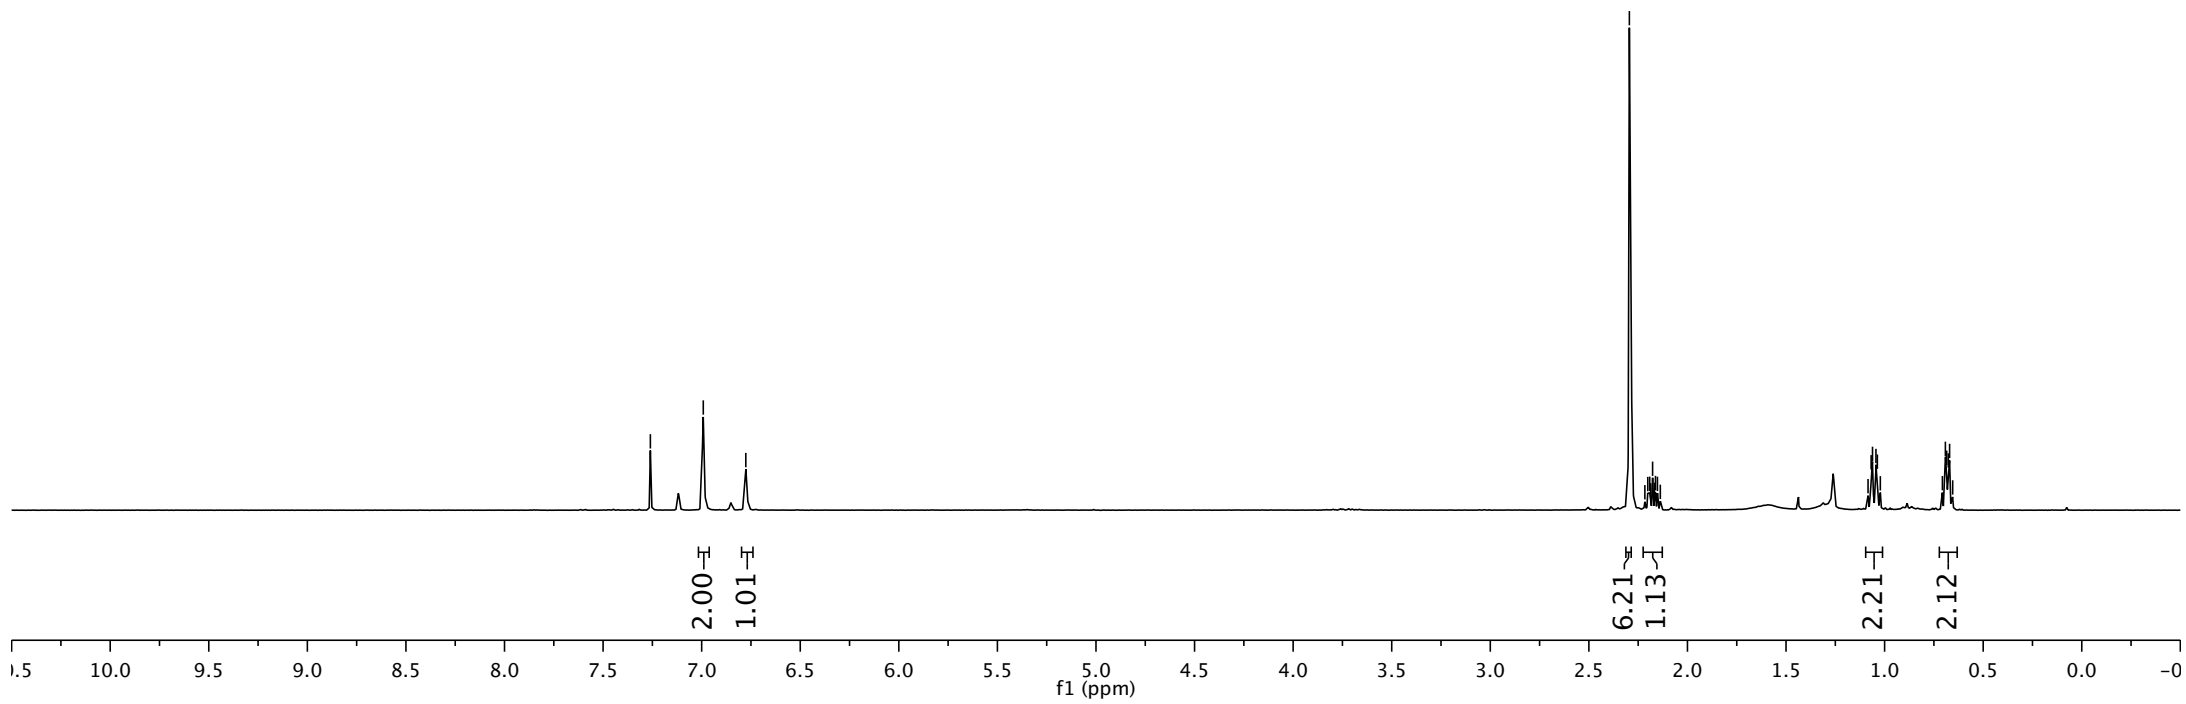

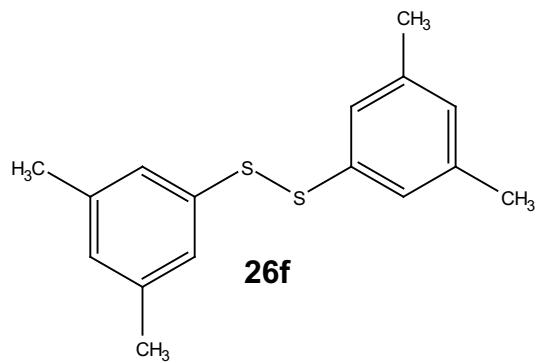

7.260  
7.119  
6.852

2.282

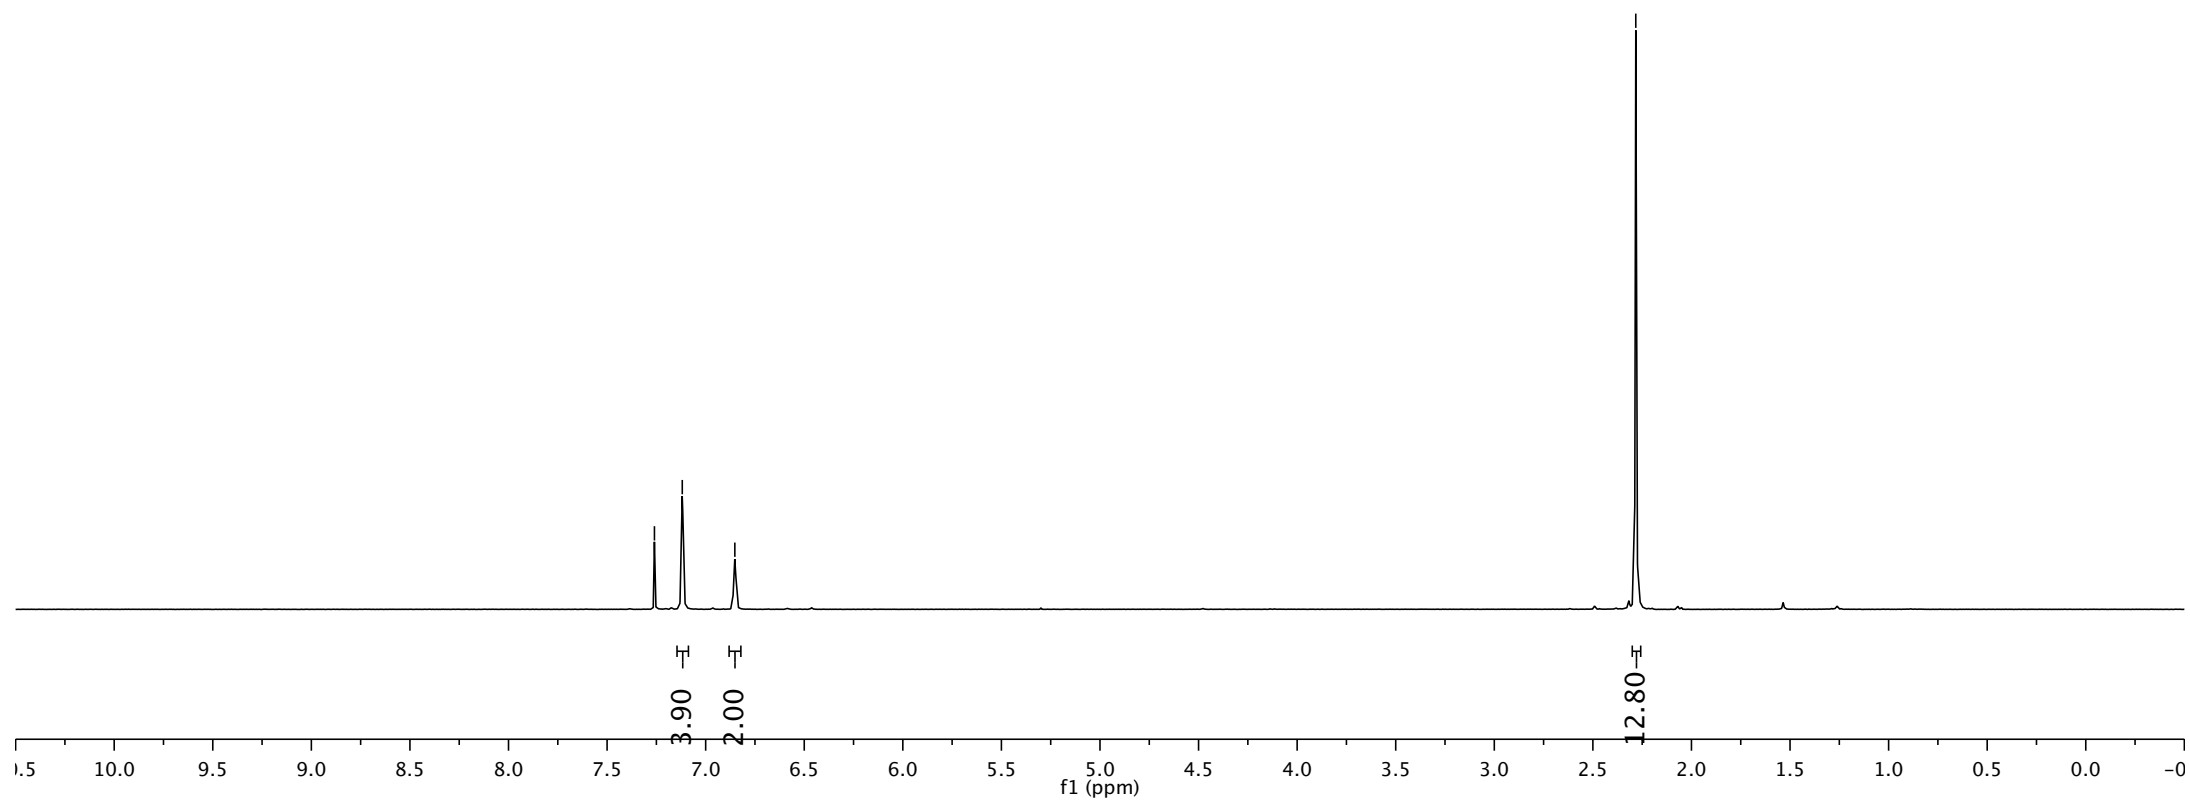

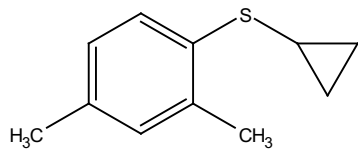

**1g**

7.413  
7.400  
7.260  
7.009  
6.996  
6.964

2.291  
2.251  
2.138  
2.131  
2.126  
2.123  
2.118  
2.113  
2.111  
2.106  
2.099

1.058  
1.050  
1.049  
1.046  
0.681  
0.677  
0.673  
0.670  
0.662

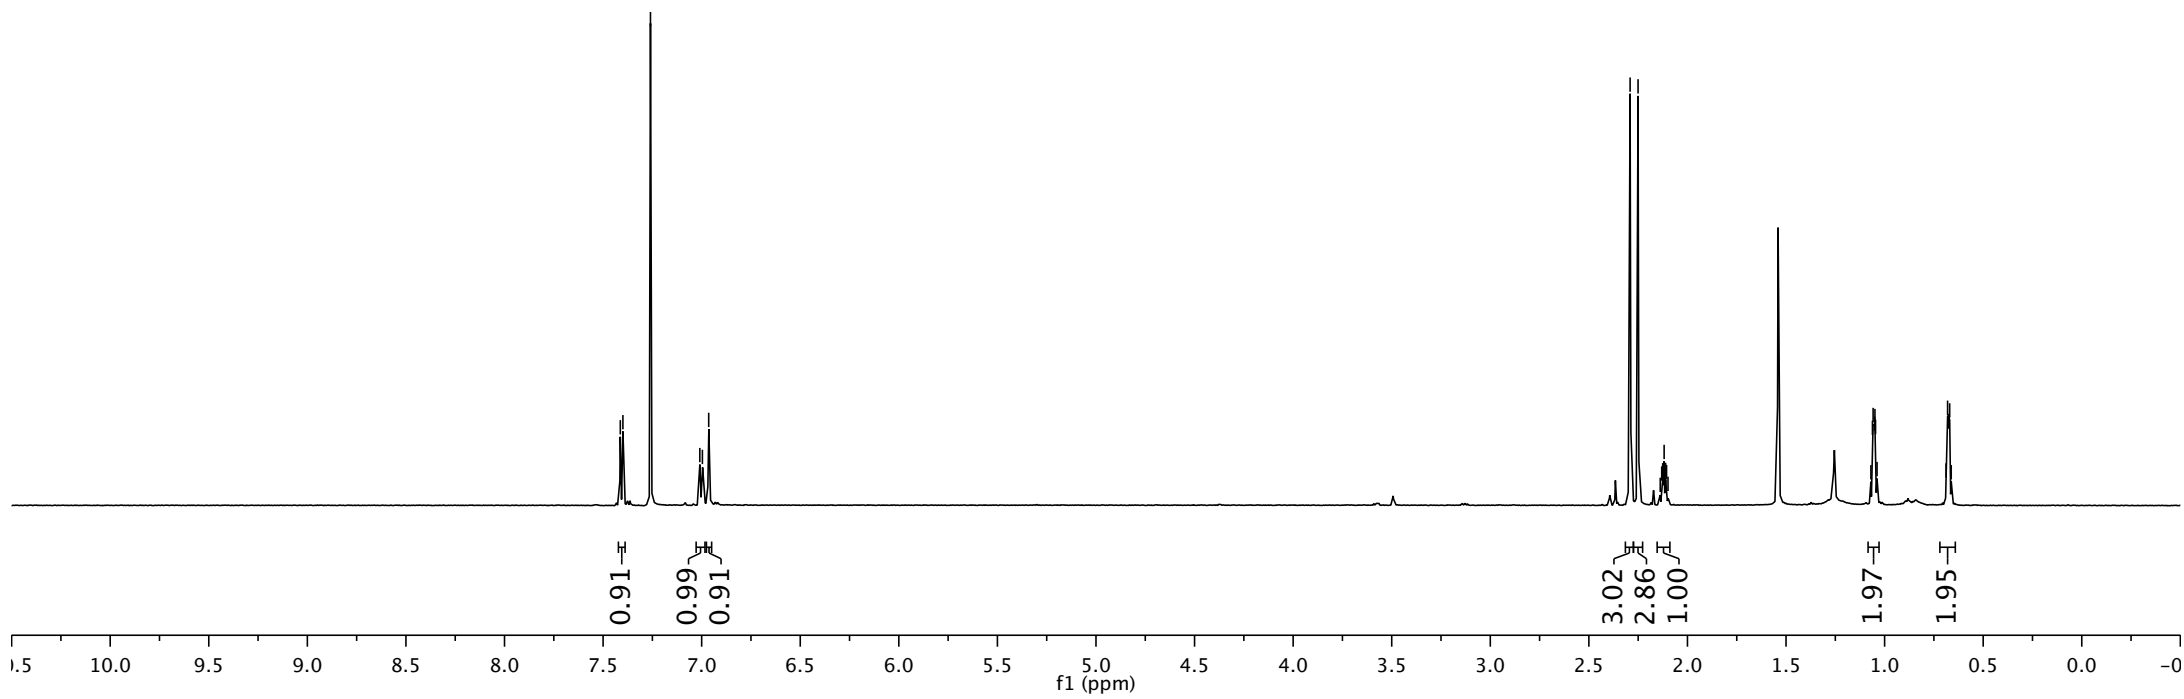

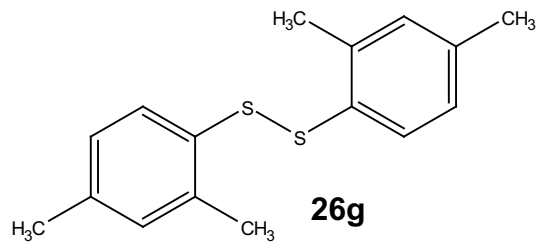

7.386  
7.360  
7.260  
6.988  
6.943  
6.915

2.369  
2.289

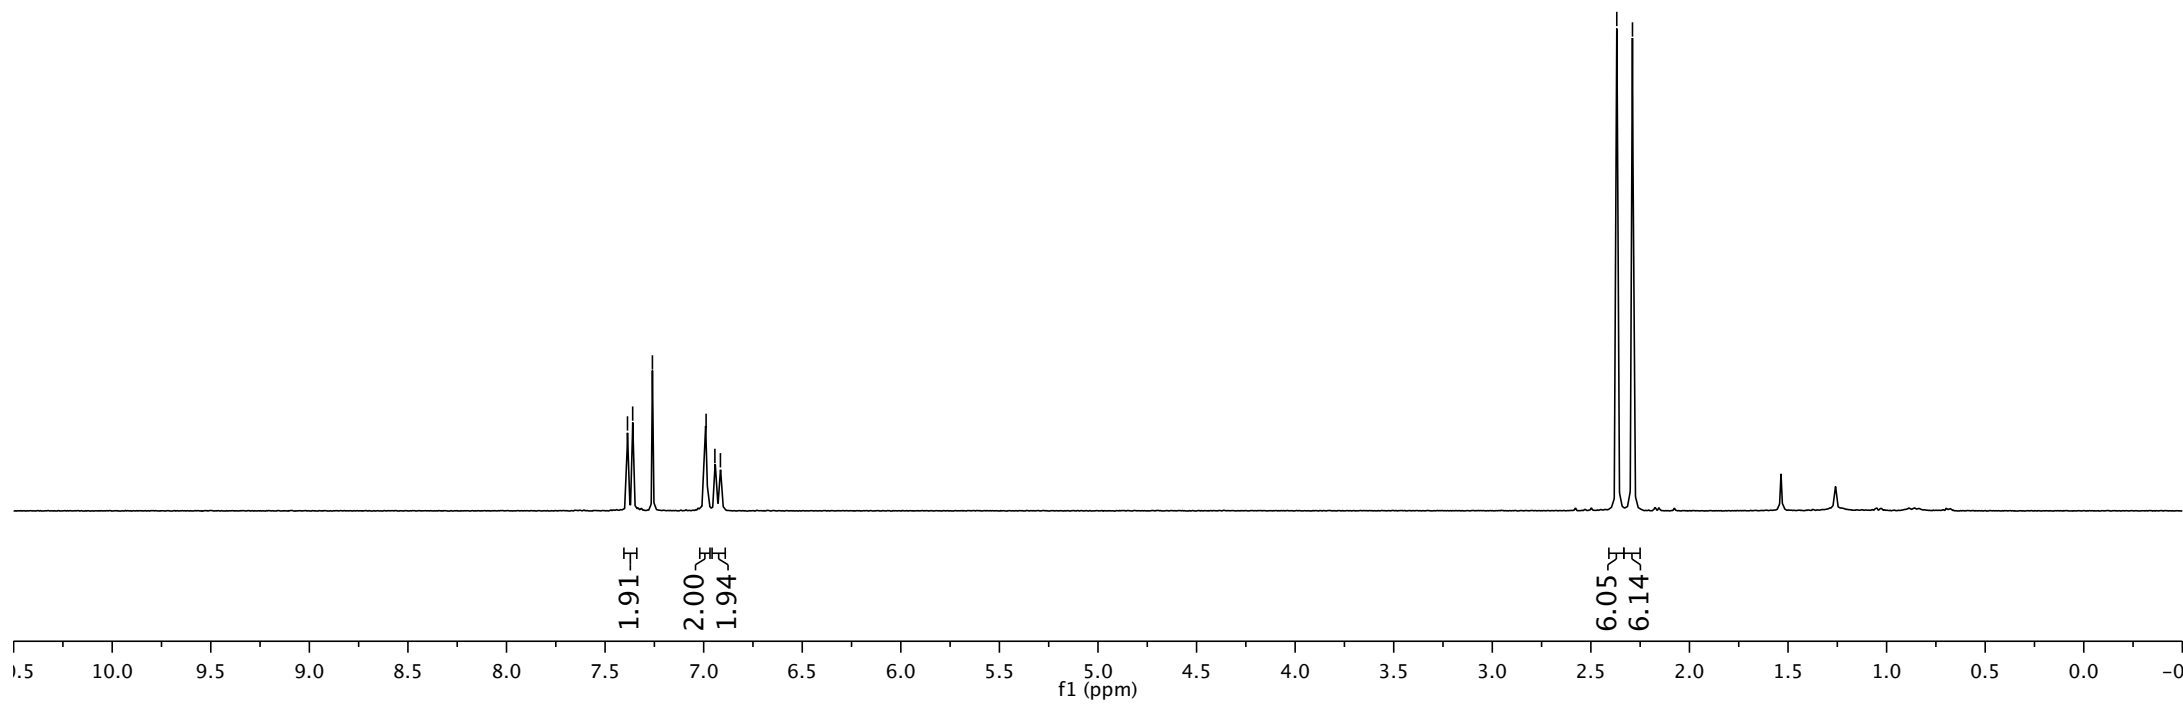

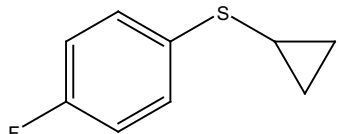

**1h**

7.373  
7.362  
7.355  
7.345  
7.339  
7.332  
7.322  
7.315  
7.305  
7.260  
7.039  
7.028  
7.021  
7.010  
7.006  
6.999  
6.992  
6.977  
6.970  
6.959

2.219  
2.205  
2.195  
2.190  
2.180  
2.170  
2.166  
2.156  
2.141  
1.071  
1.055  
1.048  
1.031  
1.024  
1.009  
0.713  
0.697  
0.691  
0.683  
0.676  
0.660

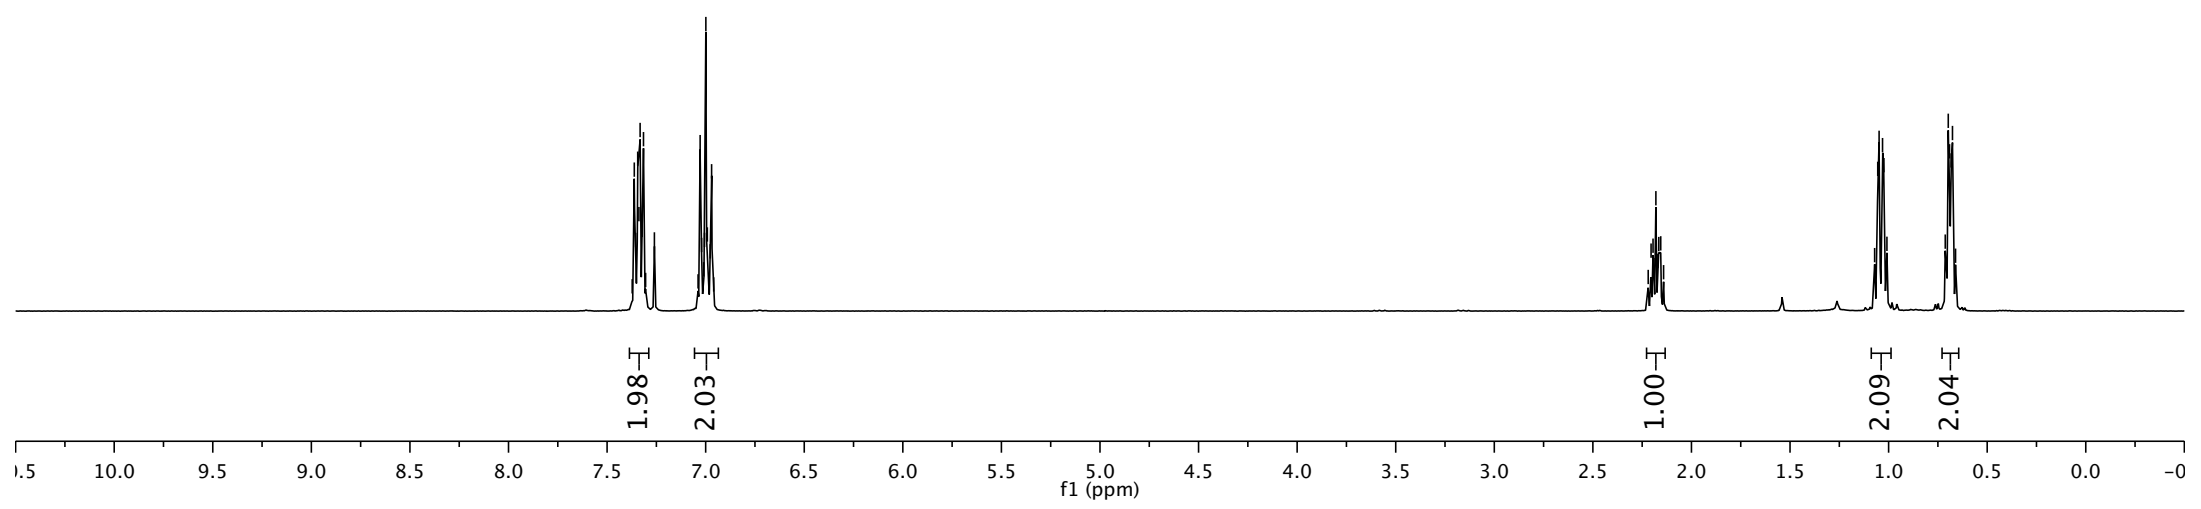

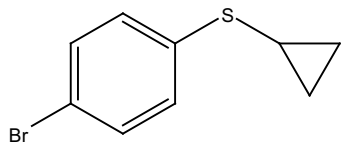

**1i**

7.416  
7.407  
7.401  
7.386  
7.379  
7.370  
7.260  
7.248  
7.239  
7.232  
7.217  
7.211  
7.201

2.201  
2.186  
2.176  
2.171  
2.162  
2.152  
2.147  
2.137  
2.123  
1.543

1.085  
1.067  
0.964  
0.698  
0.692  
0.683  
0.677  
0.661

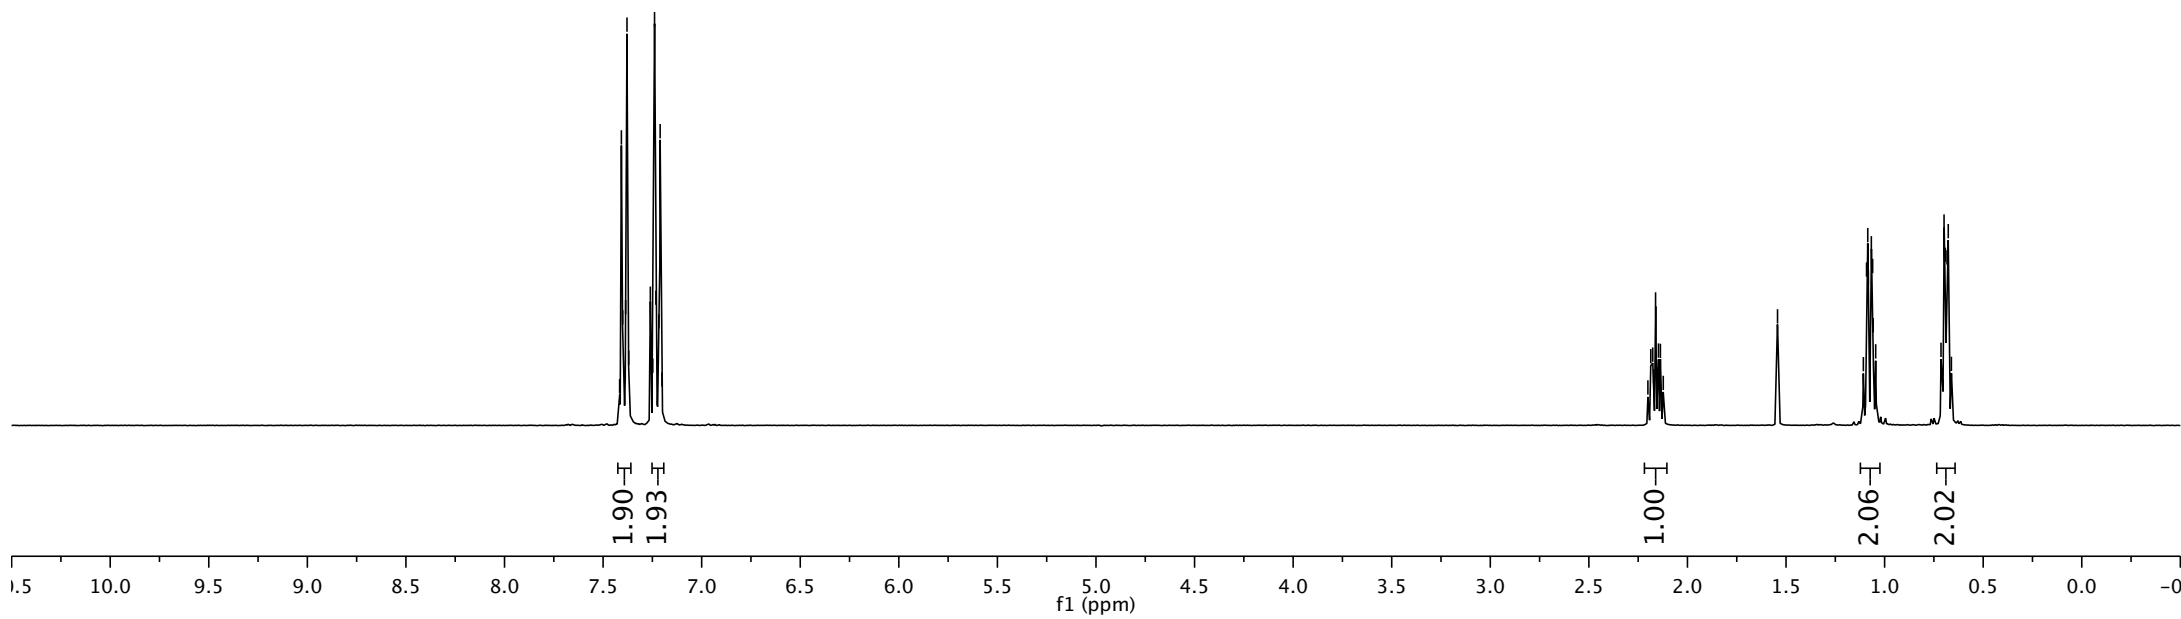

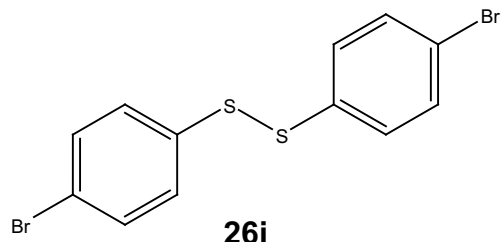

7.453  
7.444  
7.438  
7.424  
7.423  
7.416  
7.408  
7.358  
7.350  
7.343  
7.328  
7.322  
7.313  
7.261

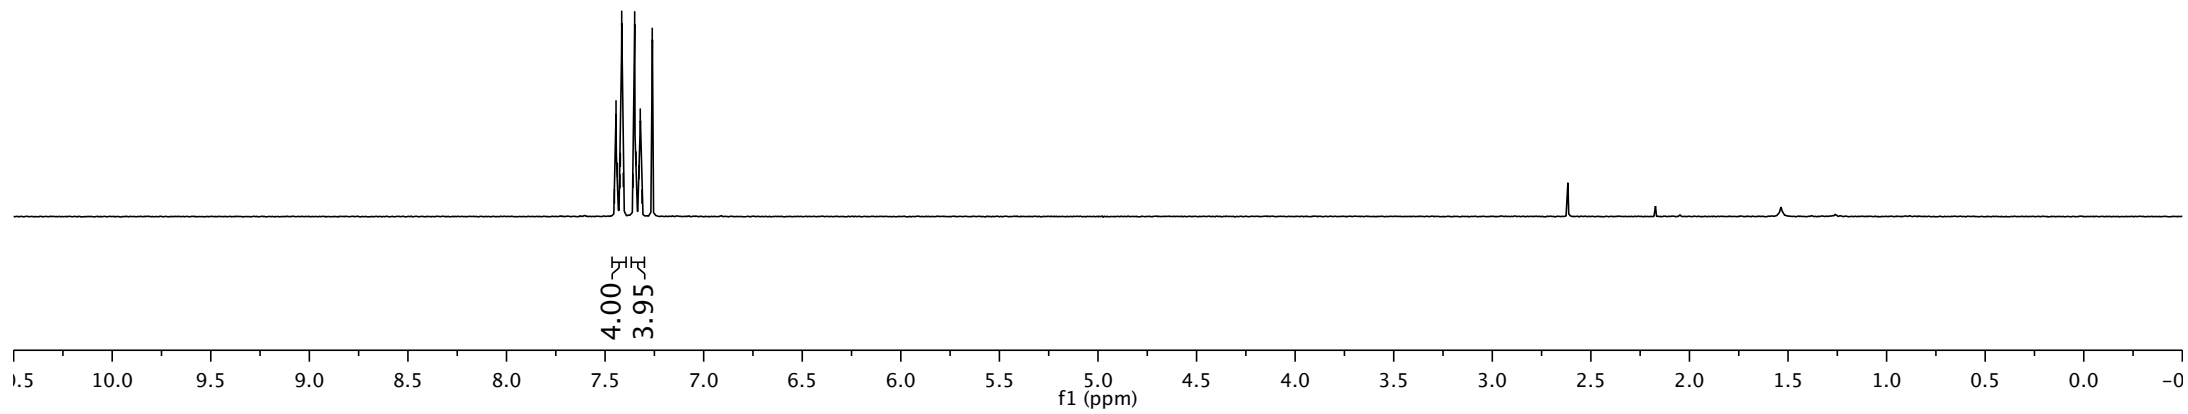



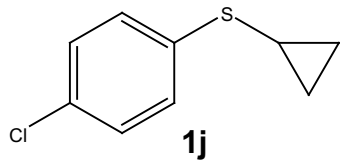

7.295  
7.287  
7.274  
7.266  
7.260  
7.254  
7.249  
7.240  
7.227  
7.219

2.196  
2.181  
2.171  
2.167  
2.157  
2.147  
2.142  
2.132  
2.118  
1.531

1.073  
1.054  
1.048  
0.691  
0.688  
0.682  
0.677  
0.674  
0.667  
0.652

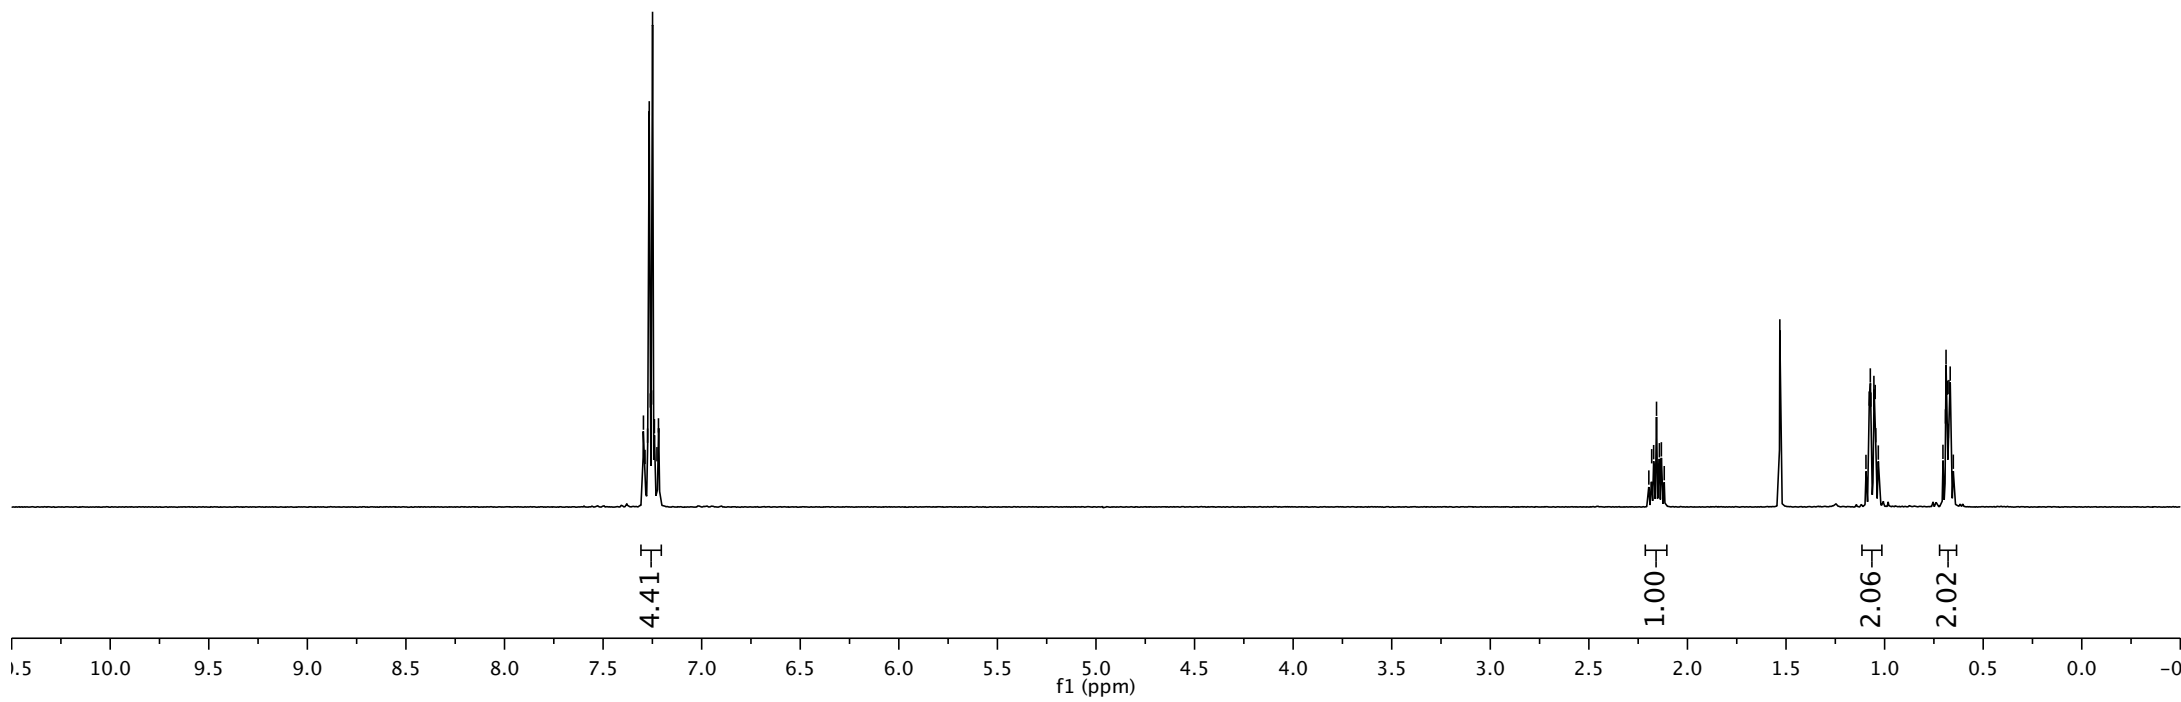

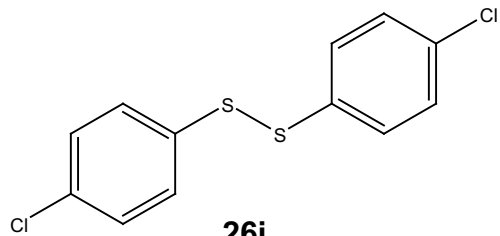

7.417  
7.408  
7.402  
7.387  
7.380  
7.371  
7.290  
7.282  
7.275  
7.260  
7.253  
7.244

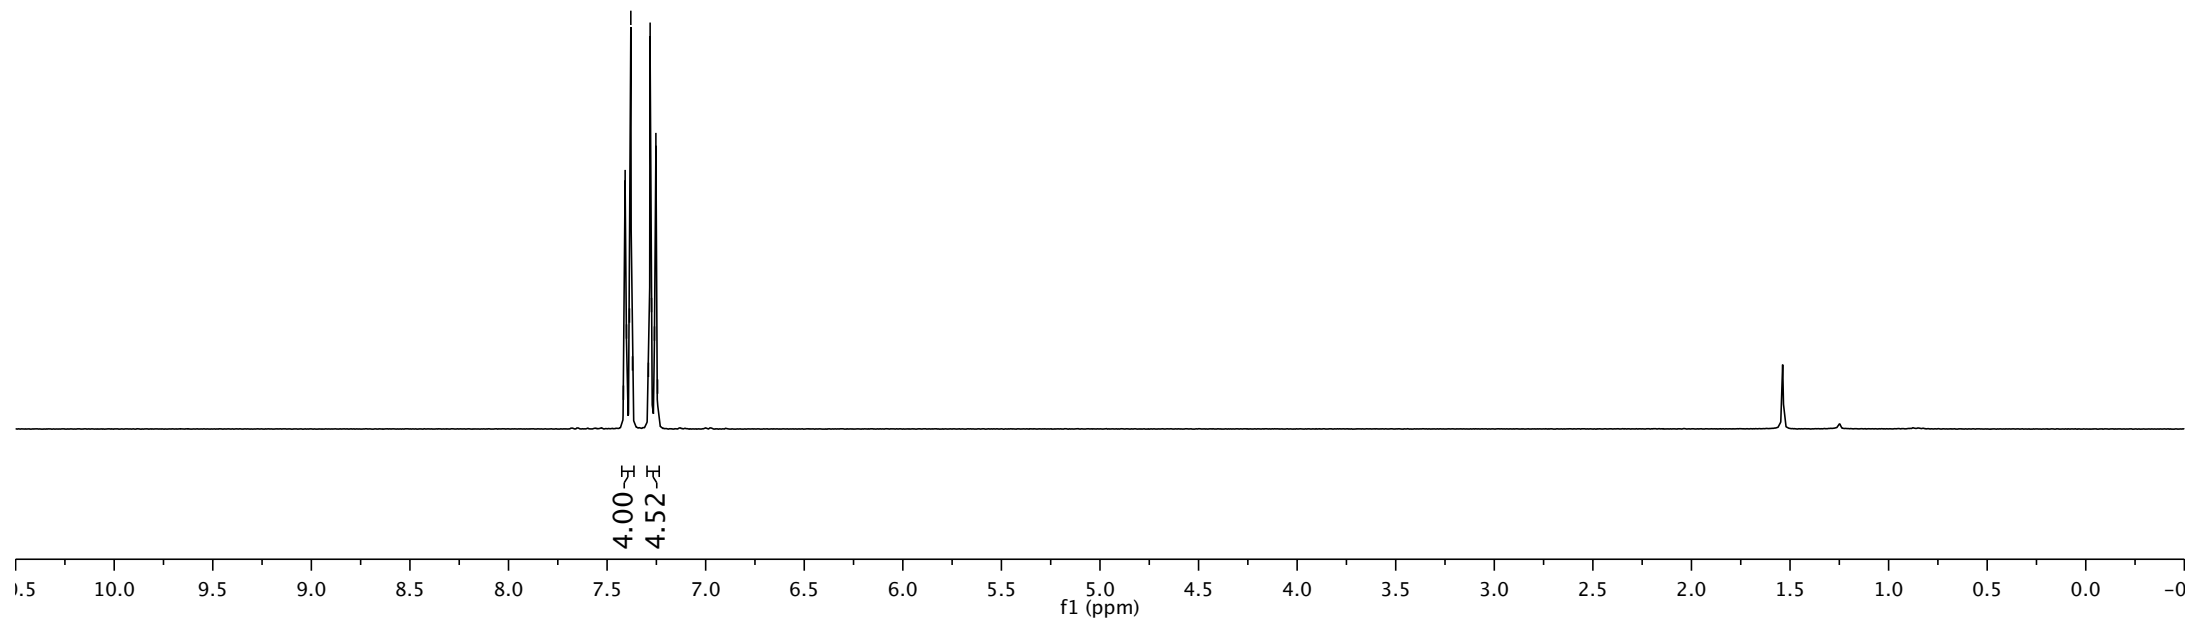

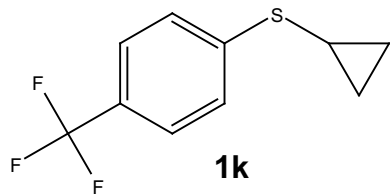

7.530  
7.525  
7.509  
7.502  
7.447  
7.419  
7.260

2.234  
2.220  
2.210  
2.205  
2.195  
2.185  
2.180  
2.171  
2.156

1.155  
1.148  
1.131  
1.124  
0.742  
0.727  
0.721  
0.712  
0.706  
0.690

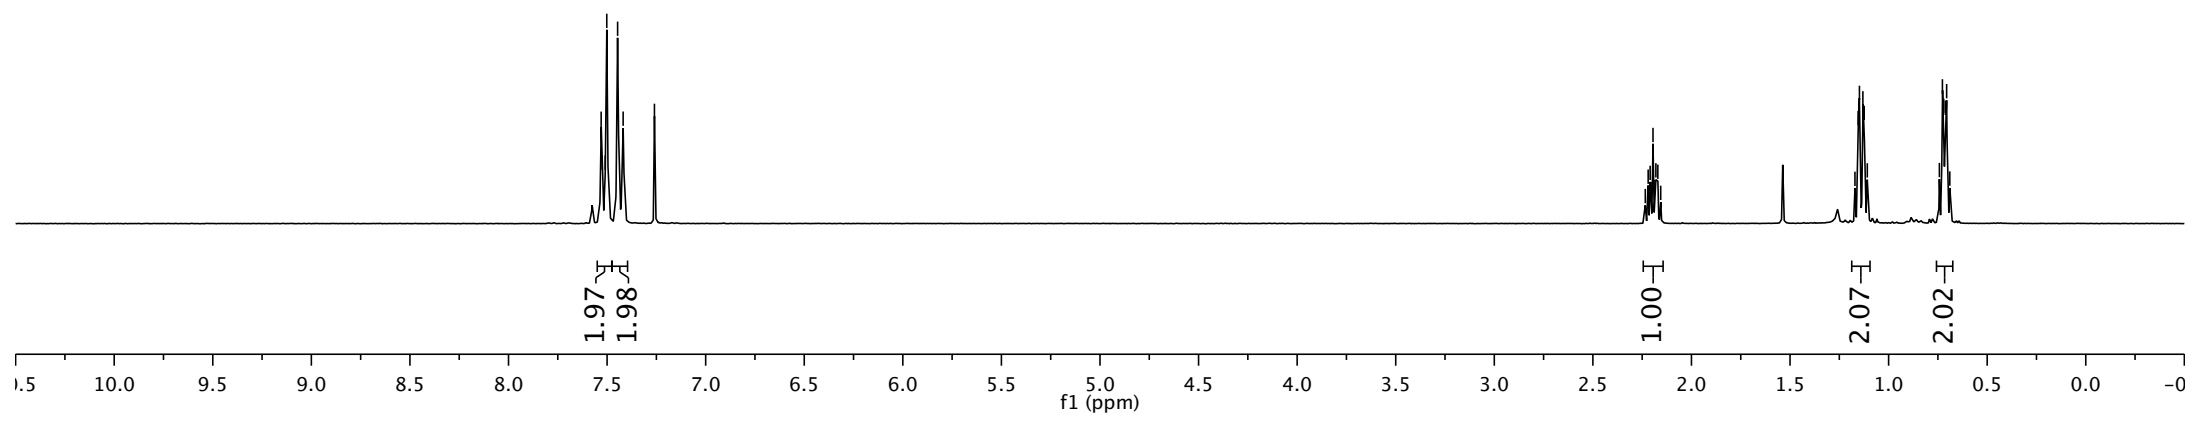

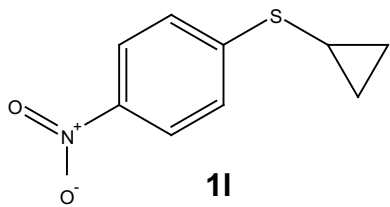

8.153  
8.144  
8.138  
8.121  
8.115  
8.106  
7.466  
7.457  
7.451  
7.434  
7.427  
7.418

2.250  
2.235  
2.226  
2.221  
2.211  
2.201  
2.196  
2.187  
2.172

1.210  
1.204  
1.186  
1.180  
0.757  
0.754  
0.748  
0.740  
0.733  
0.717

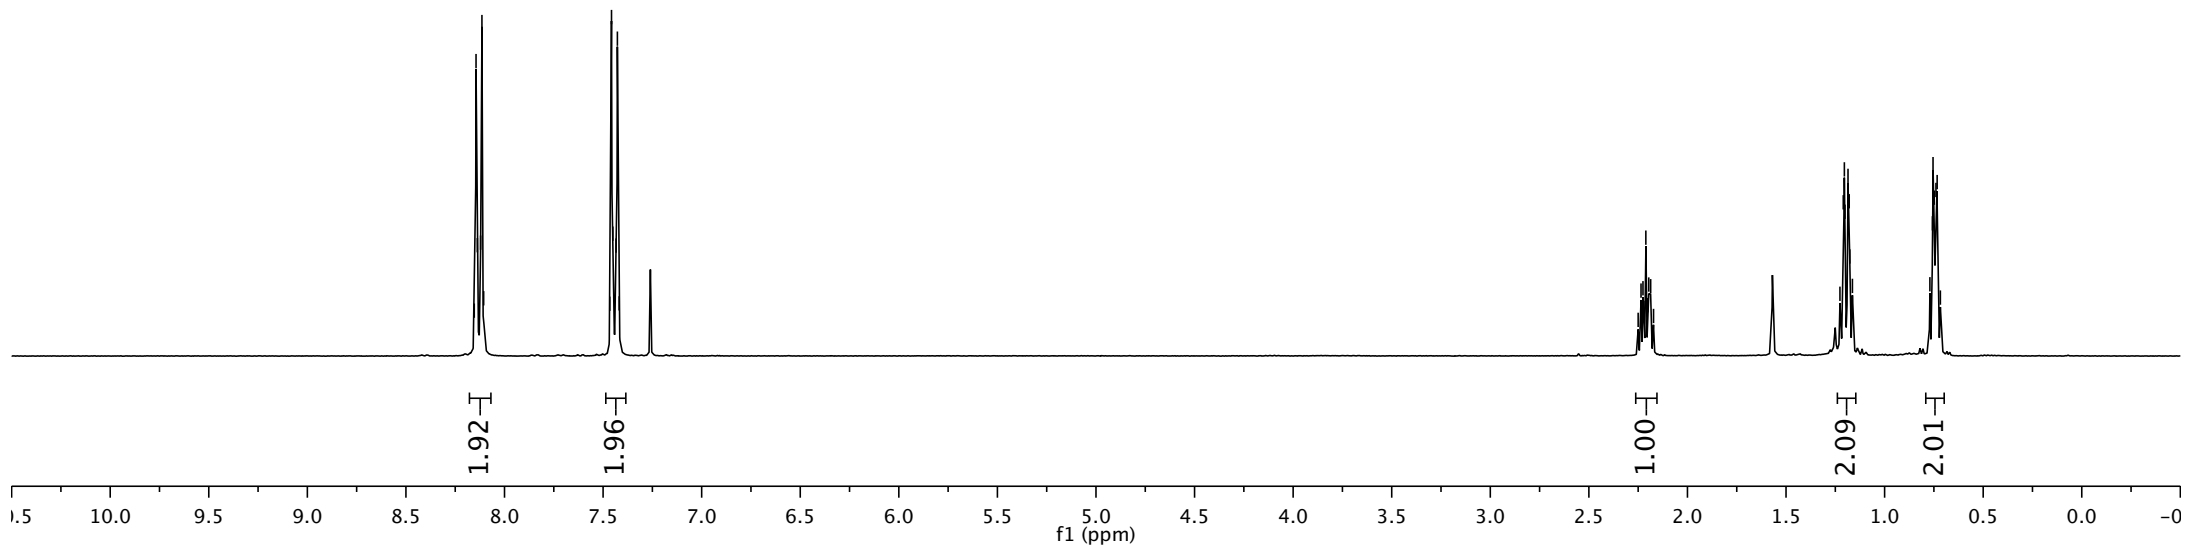

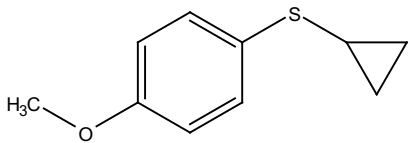

**1m**

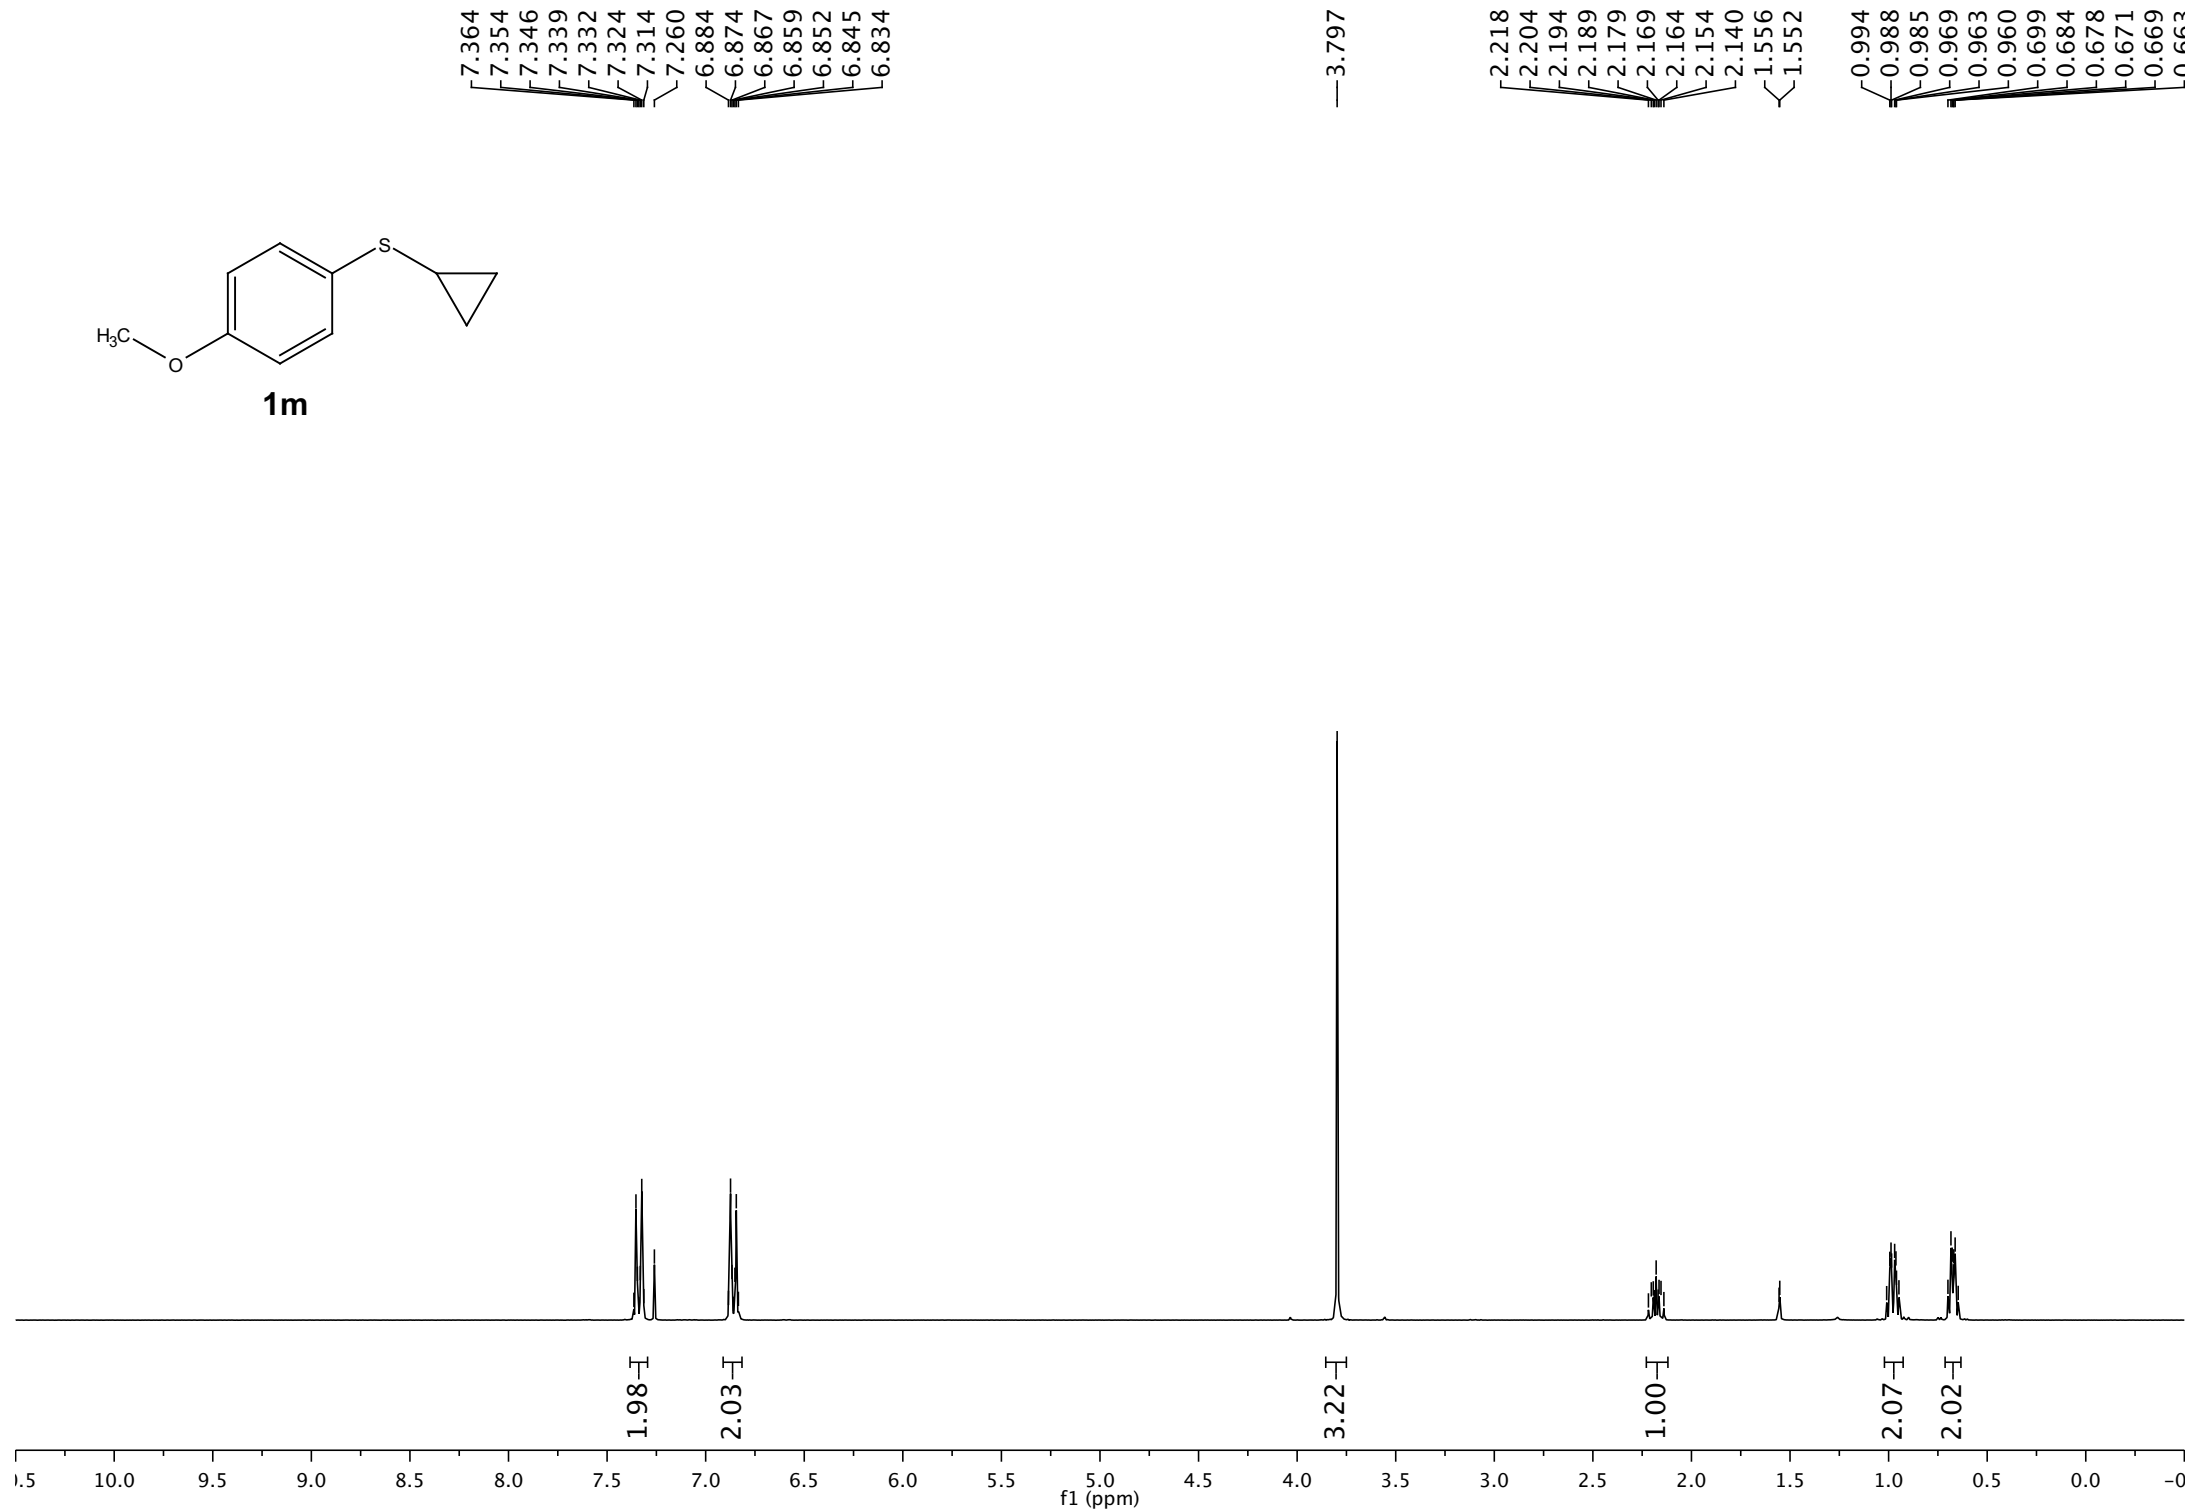

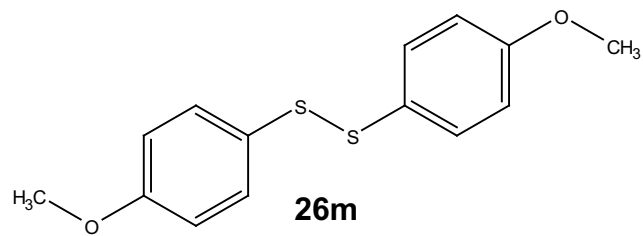

7.412  
7.405  
7.389  
7.382  
6.848  
6.841  
6.826  
6.819

3.800

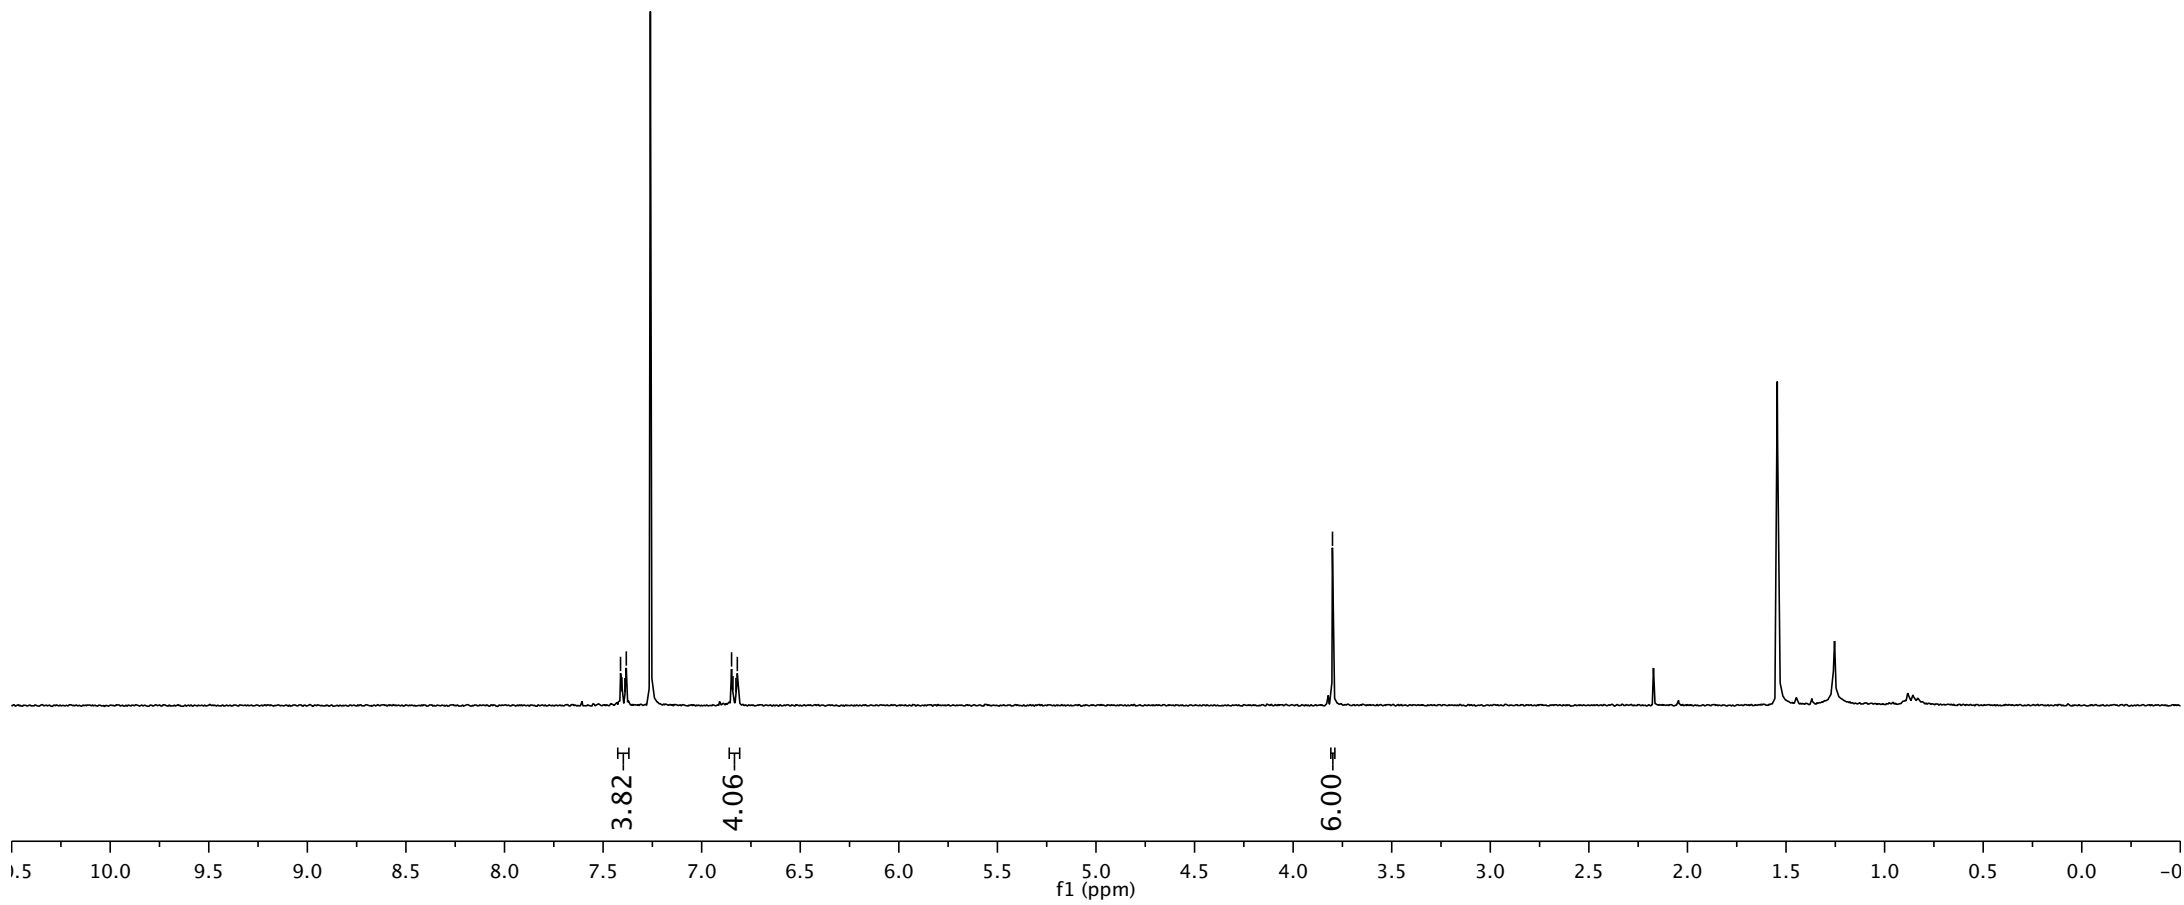

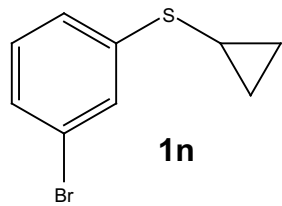

7.510  
7.507  
7.504  
7.267  
7.265  
7.262  
7.260  
7.258  
7.257  
7.256  
7.254  
7.252  
7.248  
7.245  
7.143  
7.130  
7.117

2.190  
2.183  
2.178  
2.176  
2.171  
2.166  
2.163  
2.159  
2.151

1.112  
1.108  
1.100  
0.996  
0.715  
0.707  
0.704  
0.700  
0.697  
0.689

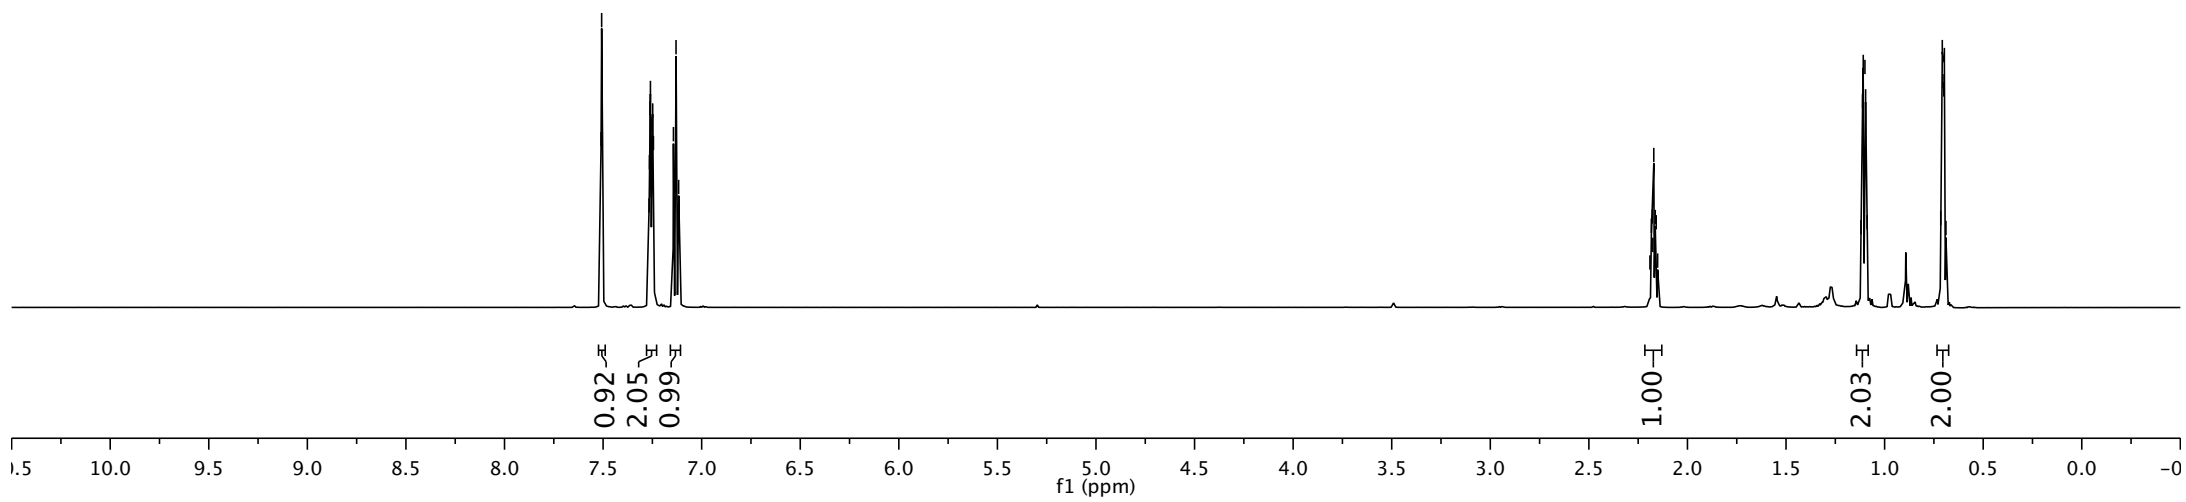

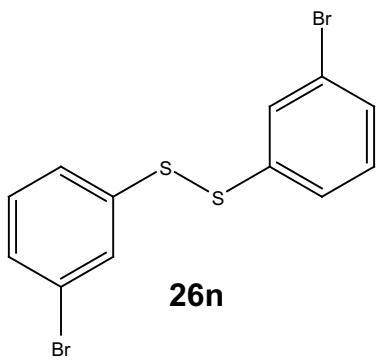

26n

7.635  
7.628  
7.622  
7.417  
7.413  
7.408  
7.390  
7.386  
7.381  
7.362  
7.357  
7.353  
7.260  
7.206  
7.180  
7.154

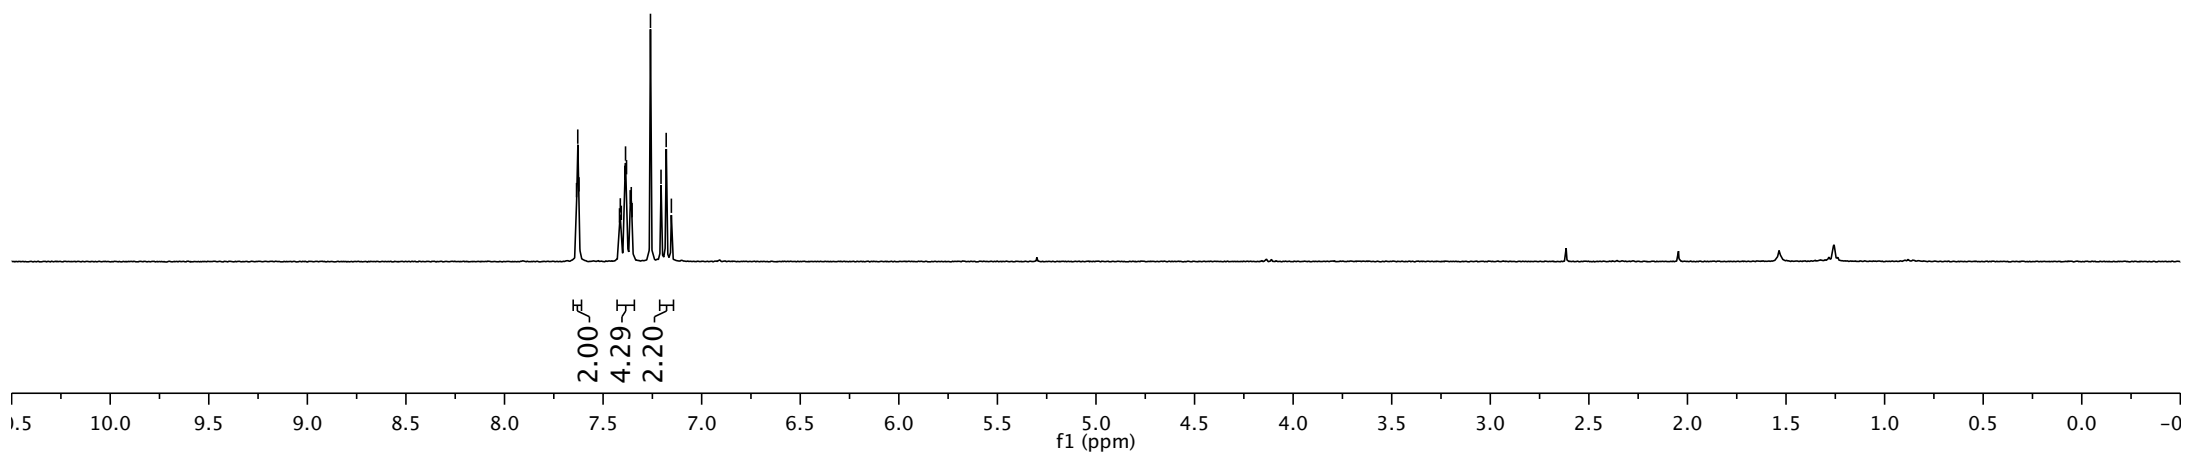



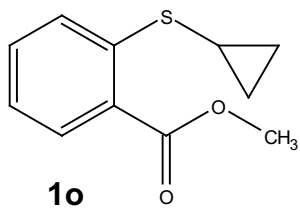

8.006  
8.000  
7.979  
7.974  
7.803  
7.799  
7.776  
7.772  
7.498  
7.493  
7.474  
7.471  
7.469  
7.466  
7.447  
7.442  
7.177  
7.173  
7.153  
7.151  
7.147  
7.127  
7.123

3.889

2.118  
2.103  
2.094  
2.088  
2.079  
2.069  
2.064  
2.054  
2.039  
1.634  
1.148  
1.142  
1.123  
1.118  
0.748  
0.731  
0.728  
0.722  
0.716  
0.713  
0.707  
0.691

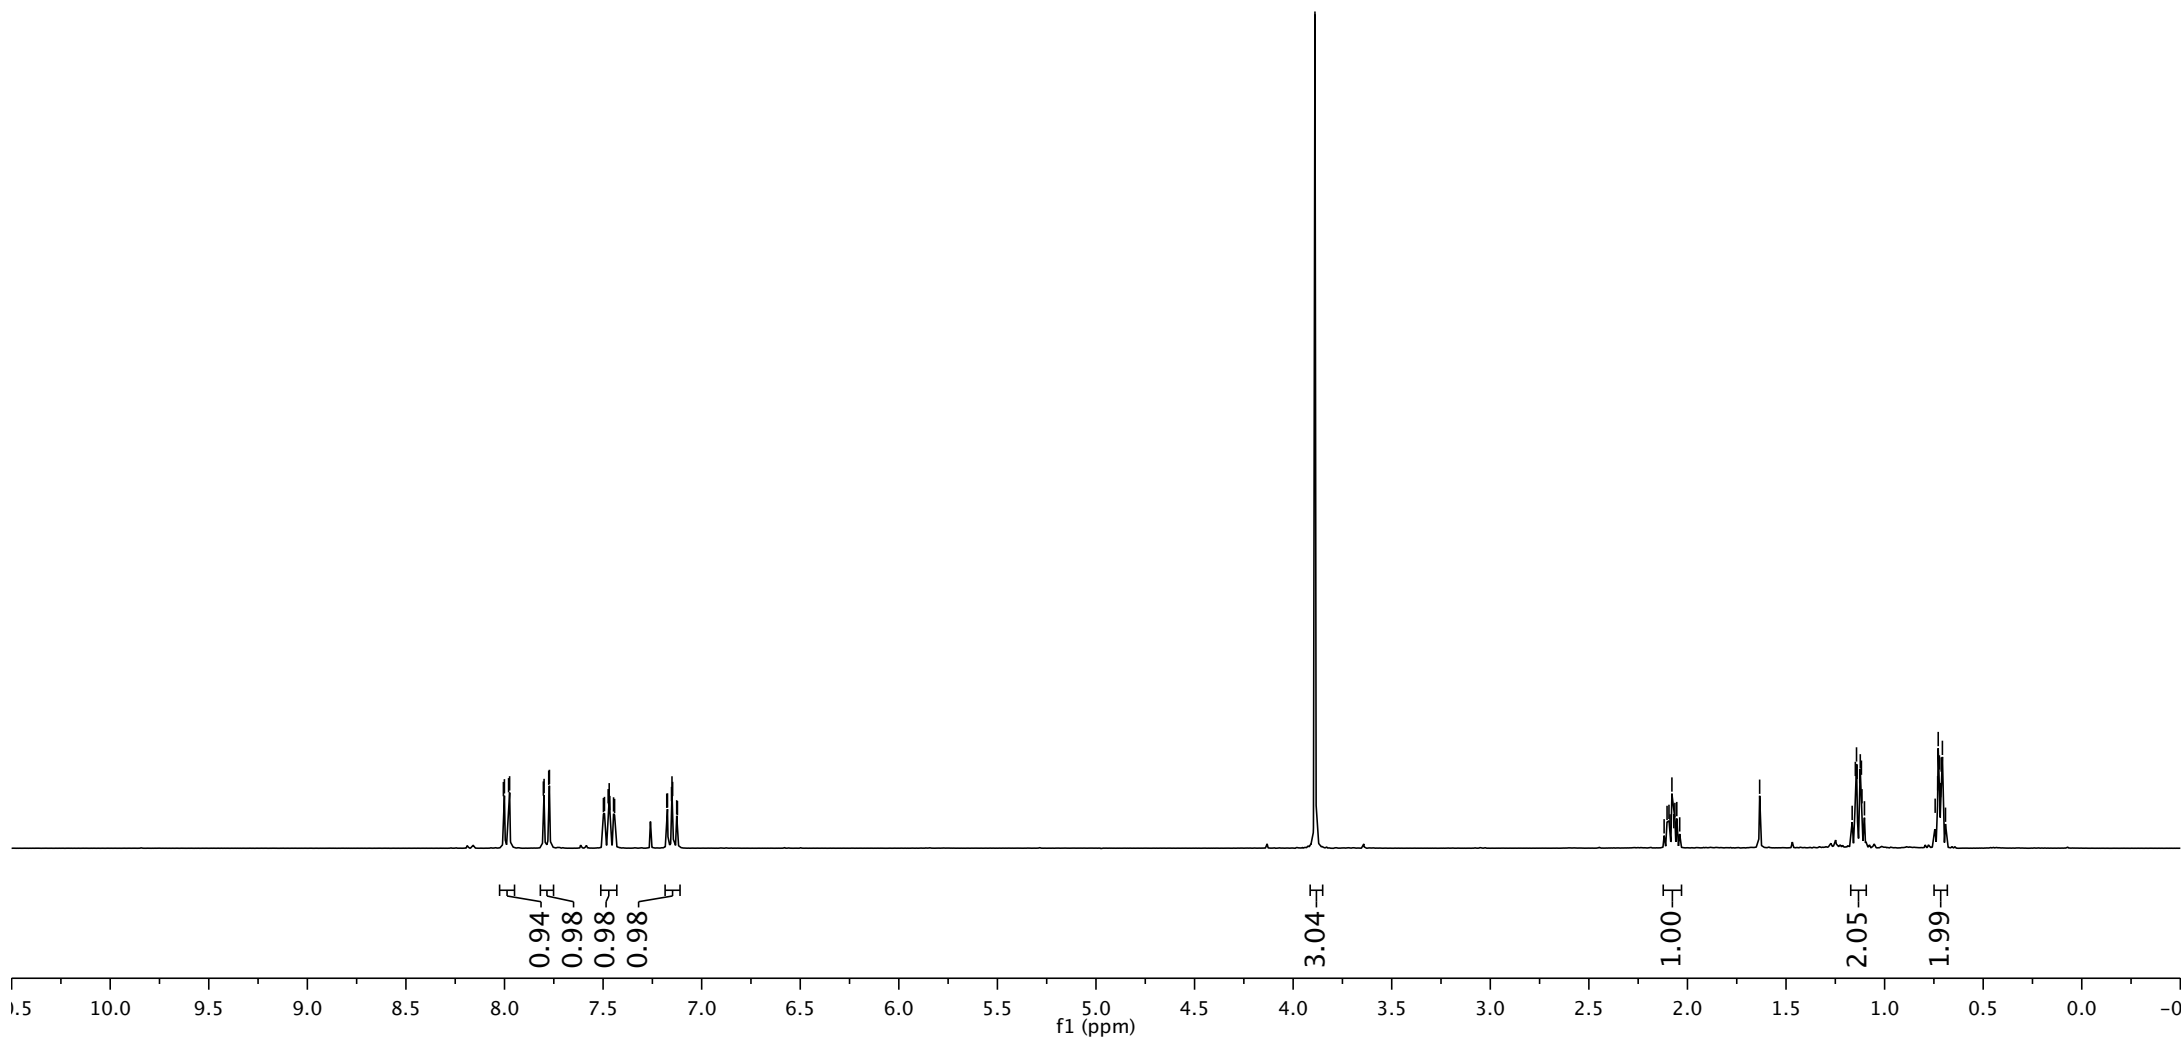

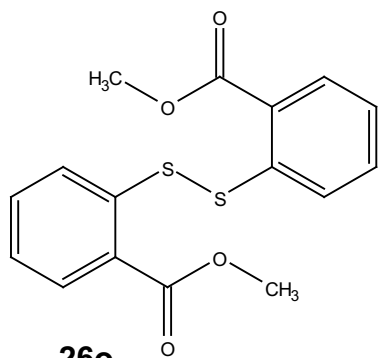

8.078  
8.073  
8.052  
8.047  
7.774  
7.770  
7.746  
7.743  
7.440  
7.435  
7.415  
7.411  
7.408  
7.388  
7.383  
7.260  
7.256  
7.235  
7.231  
7.210  
7.206

—3.990

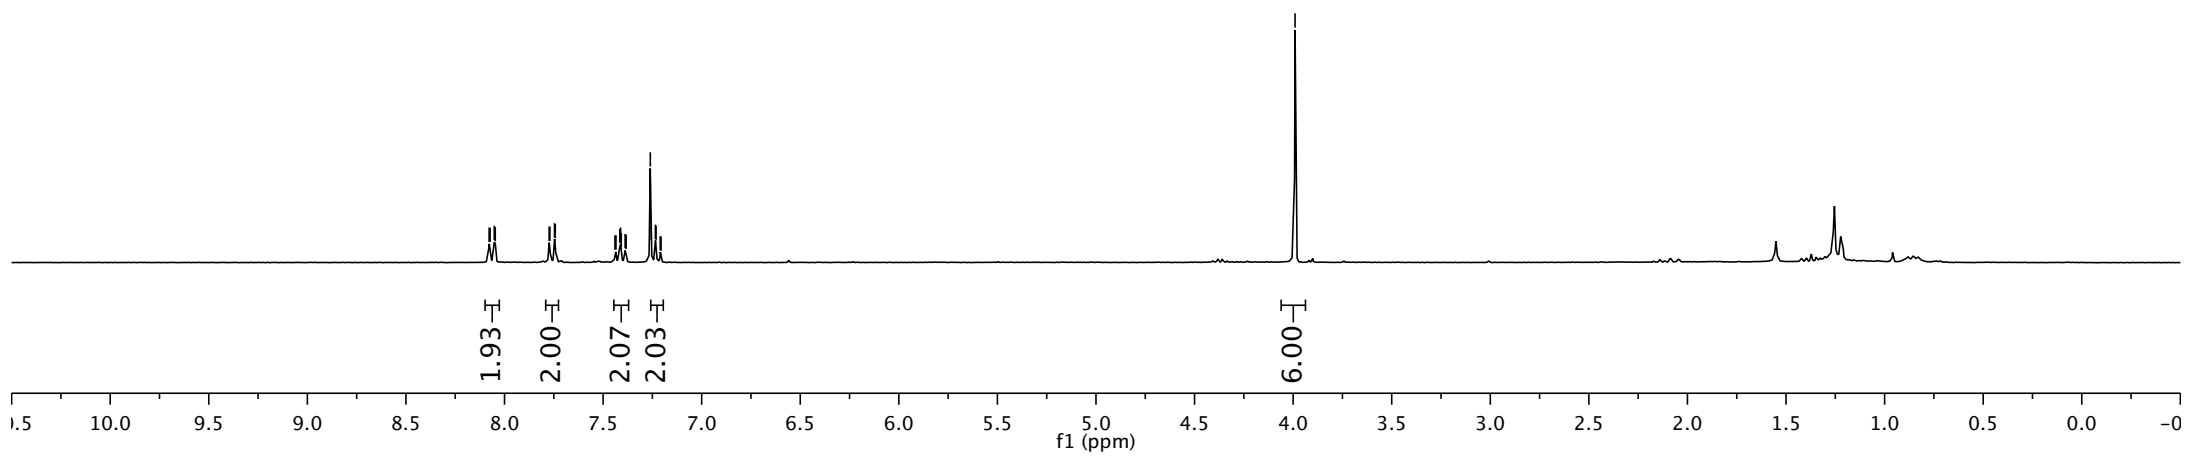

Supplement: Additional file 1 [file 1860-5397-15-113-S1.pdf]
